# Supplementary material for: Rapid collaborative knowledge building via Twitter after significant geohazard events
Source: Copernicus journal article supplement (doi:10.5194/gc-2019-23), 2019-10-28
Supplement: Supplementary file [file gc-2019-23-RC2-supplement.pdf]

## **Review: Rapid collaborative knowledge building via Twitter after significant geohazard events**

Review submitted by Beth Bartel, December 22, 2019.

### **General Comments**

This paper is a very helpful contribution to the body of literature documenting the role of social media in modern information transfer in geoscience, both for knowledge building and dissemination. I recommend it for publication pending revisions. The paper offers two different examples of information exchange and knowledge-building via social media, specifically Twitter, regarding geophysical events (in both cases, seismic events). The piece points to social media as a helpful tool in engaging the international geoscience (and public) community in understanding local events. It also brings up important questions that are yet to be addressed, concerning, for example, recognizing and giving credit to 1) the scientists who are collecting the data used by the online international community and 2) those who are participating in the informal development of scientific ideas via social media. These participants may be geoscientists by trade or informed laypeople. Social media can challenge what we think of as the scientific process and who we think of as contributing to building new scientific knowledge.

The authors do a good job, especially with the Palu example, of demonstrating how Twitter can facilitate a rapid global understanding of seismic events. It would help to include more explicit evidence to support their other arguments, including references to specific examples within the analyzed Twitter threads, as well as figures showing specific examples of knowledge building, knowledge transfer, and/or exchange between geoscientists and non-geoscientists.

I suggest going back through the conclusions to make sure each conclusion is clearly supported by the analysis and addressed in the discussion. Nothing new should arise in the conclusions unless shared as areas for future exploration. Alternatively, make it clear that the concluding remarks are the result of authors' experiences on social media through this and other events. (Or observations of others' experiences.)

### **Specific Comments**

First, a comment on my attached pdf. I know some people have an aversion to red pen. I used red pen because it is the color that best stands out against the dark text. I hope this is helpful.

#### **1) Abstract**

A statement about the purpose of the analysis would be helpful.

#### **2) Section 2, Studied Events and Methodology**

I would like more specific information on the Mayotte analysis. What did the analysis consist of? What were you looking for? Was the primary analysis the development of the word clouds? Or the exercise of organizing the discussion into three Twitter moments? Was it mainly looking

through the tweets for themes? Was anything about it systematic? How would you describe it should you want someone to repeat it? (The same goes for Palu, but to a lesser extent.)

Lines 128-130 seem to set the Mayotte analysis up as a contrast to the Palu analysis, but it appears from the list starting on line 130 that you are looking at the same things, possibly with the exception of the role of citizen scientists, which is not addressed in the Palu discussion.

Line 133: The word “aims” is likely not the best choice here, as it implies that each thread had a different goal. Presumably commenters didn’t start the threads with different goals in mind. Instead, I assume that you mean either that the aims of the *analyses* of each thread were different or that the *nature* or *characteristics* or *circumstances* of each thread were different. (I’m not italicizing to be a jerk, just to emphasize the words I think could be substituted.)

Section 3.1:

Lines 152-188: It would be helpful to call out who posted info on Twitter other than the monitoring agencies (since you do refer to them), to show who was contributing to the knowledge-building process. You don’t need specific names, but it would be helpful to know: academic scientists? Researchers from other institutions? Other?

Line 198: It would be helpful to know more about the scientists, e.g., example institutions or at least institution types (as in comment above); all academics? From other agencies? You write later about the democratization of science, and about the diversity and subdisciplines of geoscience; this would be a good place to lay the groundwork for those statements by pointing out the diversity of voices in the conversation. (All seismologists, or various disciplines? Different data types being shared and considered together? Different career stages, nationalities, etc.?)

Line 206: Regarding “creates”: Be careful with the use of present vs. past. Present implies a general truth, in this case that Twitter creates the opportunity for developing new international collaborations. I think what you mean—and what I think is appropriate in this section—is that the Twitter interactions during the Palu event created the opportunity for developing new international collaborations. (In which case, use past tense, created.) This is an example of why defining your pronouns is also important (see General comments under Technical Corrections, below). If you want to make a general statement here, I suggest something like “Exchanges like this create the opportunity....”

~Line 220: Wasn’t the geometry of Palu Bay, not only the timing, part of the scientific discussion? If I’m remembering wrong, ignore. If this was indeed part of the discussion, consider bringing it in.

Lines 210-222: I recommend reworking this paragraph for clarification. It is worth expanding on this—don’t be afraid to take up more space explaining the situation.

Line 222+: This section would benefit from a short concluding paragraph.

Lines 230-236: As I wrote in the margin, I think a shot of these early tweets would be a helpful figure.

Line 241: I'm not convinced that this work is a contextual analysis. My impression is that it is another form of content analysis. I'm not an expert in this, however.

Line 253: An intro sentence would be helpful here.

Lines 263-268: An intro and/or conclusion sentence with main point(s) would be helpful. Also, I don't find the SH tweet quote helpful, especially as he is an author (meaning you can just state that idea in your text as authors, rather than quoting the tweet). Here quoting these casual tweets is a little like saying "after this event, someone told me over coffee that \_\_\_\_." As in, it is not evidence of anything. You can make the arguments based on your analysis instead. I also don't find the corresponding figure helpful (Figure 4), especially in the absence of other tweet examples that would be more pertinent in this paper, such as the tweets that started the Mayotte conversation. I recommend either removing the figure or reworking this paragraph and the figure caption to justify including it.

Lines 274-278: Valid points, but they need back-up. They seem speculative. The comments on the people living in Mayotte are also potentially demeaning, and I recommend more careful wording here. What was the mention of the "sea monster"? Please clarify context.

Can you comment on how the pitfalls with Mayotte compare to the Palu example? Were they absent from the Palu case? (Aside from the bushy nature of the thread, which you have made a clear case for already.)

#### Section 4.1

Lines 302-305: I don't see two of the ideas stated here clearly stated in and supported by the analysis (noted in the margins). Specific quotes or figures in the analysis to support these ideas would be helpful.

Lines 310-315: This is an important discussion. You may want to clarify a bit: Are you referring to use of open access data, or people using info posted by agencies on Twitter, or...? If I understand right, you are referring to researchers (not at the responding agency) using tweets, blog posts, and media releases posted by the responding agency to further their own science without collaboration with the responding agency scientists, and faster than the responding agency scientists can publish.

#### Section 4.2:

Line 320: Who was already in the discussion, and was it already international? It would be helpful to know more about the discussion the Indonesian scientists "joined." (Noting that they, too, are part of the international scientific community—you may want to reword to make this clear.)

Lines 325-328: What are the implications? Problem? Limitations? And what specifically happened with Mayotte in May 2019? And does it relate to / show up in your analysis?

#### Section 4.4.

You may be able to combine or reorganize some of the sections, for example 4.1 with 4.4.

Lines 367-371: This mixes peer review (process) and publications (output). These should be considered separately. This may also fit into section 4.1, as noted above.

Lines 374-375: How does this relate to social media? This seems an argument for open-access journals.

#### Section 4.5

Lines 380-381: Justification or citation?

Lines 382-383: Justification or citation?

#### Section 5: Concluding remarks

I suggest focusing this section first on the benefits of using social media to rapidly characterize geophysical events, which is your main point (and what your analysis is focused on) throughout the rest of the paper.

You bring up other important discussion points, not all of which are addressed directly by your analysis. Since you are using this space to remark on the nature of science and science communication beyond your analysis, make this clear somewhere, such as at the end of the first paragraph. Use examples, describe the experiences of authors or at least state whether the statements are based on the experiences of authors, or use citations where possible. At the very least, set the expectations of readers by letting readers know that you are diverting from your analysis-based conclusions.

#### Figures:

Figure 1: Needs a legend. What does red mean, what does blue mean? Also, curved line to the right of the circles is a nice idea but could be removed—it tricked me into thinking there were a lot of points stacked on one another.

Reword the text for consistency in format. You may try changing all statements to read as though they end in “posted,” since this is a timeline of information as it appears on Twitter, not as it is produced. Modify the caption to reflect this.

“Polemics about a “failed” tsunami warning is vain.” – I recommend a reword. Polemics is not common enough, vain is not quite right here. Edit this also in other appearances in the manuscript.

Figure 2: I would like to see an example of knowledge-building as the first figure of tweets, since that’s what the paper most focuses on. Then, I would like to see figures showing examples of the other points you would like to make—e.g., interactions with journalists, correcting

misinformation, transfer of knowledge/information to non-geoscientists, peer review process online, and/or contributions of non-geoscientists to the scientific discussion.

Please include a more descriptive figure caption for Figure 2.

Figure 3: More descriptive figure caption. Include a sentence on the implications of the word clouds (you can repeat from the main text). Do this for all figure captions. A reader should be able to read the figure caption to get the point of the figure without having to go back to the text. (This will increase the reach of your ideas—think of the people who are only going to read the abstract, intro, figures, and conclusions!)

Tables:

I think these tables are key to understanding your analysis. I recommend at least Table 1 in the text rather than having them as a supplement.

Table 2: The link to Ken's doesn't work ☹️.

### **Technical Corrections**

Most of my technical corrections are noted on the accompanying marked-up pdf.

*In general:*

- Back up general statements with references or evidence as much as possible.
- The writing could be strengthened by removing unnecessary words and phrases to make the piece clearer and more readable.
- Several word and phrase choices are likely the result of translations; I suggest substituting more commonly used words.
- Writing would be strengthened by minimizing the use of passive tense and also of hyphenated statements.
- Define pronouns as much as possible.
- Be consistent with date formats.
- Cut sentences that aren't necessary, ones that don't either state or support a point you are making. In some cases, you should either take out sentences or be more specific about how they relate to what you are trying to convey.
- I suggest reading each paragraph to make sure 1) there is a main point or topic; 2) that the point or topic is clearly stated; and 3) all information in the paragraph is relevant to and supports that topic (and that the connection to the topic is clear).

If I underlined text without remarking, I am suggesting a rewrite based on one of the points above. (I have not marked all the places where the above points apply, however, in particular where it comes to paragraph and idea organization.)

This paper brings up an interesting question about how to cite Twitter threads. Some of the references in the text feel misleading, as in I read them expecting a published and vetted reference, and instead find a Twitter thread. This is a whole philosophical conversation—maybe

it's already been resolved, and is now standard? I'll leave the issue of citations to the assigned editor.

There are a lot of marks on the document. As an editor and not as a grader, I'm not calling out the good stuff. There's plenty of good stuff in there too! I would like to express gratitude to the authors for taking the time to not only engage in communication via social media, but also for the time and effort taken to call out these efforts and the nature of science via Twitter in this publication. This piece will be an important contribution to the science communication literature.

Please follow up with my on questions as needed.

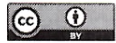

## Rapid collaborative knowledge building via Twitter after significant geohazard events

Robin Lacassin<sup>1</sup>, Maud Devès<sup>1,2</sup>, Stephen P. Hicks<sup>3</sup>, Jean-Paul Ampuero<sup>4</sup>, Remy Bossu<sup>5,6</sup>, Lucile Bruhat<sup>7</sup>, Daryono<sup>8</sup>, Desianto F. Wibisono<sup>9</sup>, Laure Fallou<sup>9</sup>, Eric J. Fielding<sup>10</sup>, Alice-Agnes Gabriel<sup>11</sup>,  
5 Jamie Gurney<sup>12</sup>, Janine Krippner<sup>13</sup>, Anthony Lomax<sup>14</sup>, Muh. Ma'rufin Sudibyo<sup>15</sup>, Astyka Pamumpuni<sup>16</sup>, Jason R. Patton<sup>17</sup>, Helen Robinson<sup>18</sup>, Mark Tingay<sup>19</sup>, Sotiris Valkaniotis<sup>20</sup>

Corresponding author: lacassin@ipgp.fr

- 1 Université de Paris, Institut de physique du globe de Paris, CNRS, F-75005 Paris, France  
2 Université de Paris, Institut Humanités Sciences Sociétés, Centre de Recherche Psychanalyse Médecine  
10 et Société, CNRS, Paris, France  
3 Department of Earth Science and Engineering, Imperial College London, United Kingdom  
4 Université Côte d'Azur, IRD, CNRS, Observatoire de la Côte d'Azur, Géoazur, France  
5 European-Mediterranean Seismological Centre, France  
6 CEA Centre DAM Ile de France F-91297 Arpajon, France  
15 7 Laboratoire de Géologie, Ecole normale supérieure, PSL Research University, CNRS, Paris, France  
8 Earthquake and Mitigation Division, Agency for Meteorology Climatology and Geophysics, Indonesia.  
9 Semarang, Central Java, Indonesia  
10 Jet Propulsion Laboratory, California Institute of Technology, Pasadena, California, USA  
11 Department of Earth and Environmental Sciences, Ludwig-Maximilians-Universität München, Munich,  
20 Germany  
12 Citizen scientist, United Kingdom Earthquake Bulletin, United Kingdom  
13 Global Volcanism Program, National Museum of Natural History, Smithsonian Institution, Washington  
D.C., USA  
14 ALomax Scientific, Mouans-Sartoux, France  
25 15 Kebumen Natural Disaster Response, Kebumen, Central Java, Indonesia  
16 Institut Teknologi Bandung, Indonesia  
17 Department of Geology, Humboldt State University, California, USA  
18 Powerful Earth, United Kingdom  
19 University of Adelaide, Australia  
30 20 Koronidos 9, 42131 Trikala, Greece

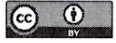

## Abstract

Twitter is an established social media platform valued by scholars as an open way to disseminate scientific information and to publicly discuss research results. Scientific discussions are widely viewed by the media who can then pass on information to the wider public. Here, we take the example of two 2018 earthquake-related events which were widely commented on Twitter by geoscientists: the Palu  $M_w$ 7.5 earthquake and tsunami in Indonesia and the long-duration Mayotte island seismo-volcanic crisis. We build our study on a content and contextual analysis of selected Twitter threads about the geophysical characteristics of these events. From the analysis of these two examples, we show that Twitter promotes very rapid building of knowledge – in the minutes to hours and days following an event – via an efficient exchange of information and active discussion between the scientists themselves and with the public. We discuss the advantages and potential pitfalls of this relatively novel way to make scientific information accessible to scholarly peers and to lay people. We argue that scientific discussion on Twitter breaks down the traditional “ivory towers” of academia, following growing trends towards open science, and may help people to understand how science is developed, and, in the case of natural/environmental hazards, to better understand their risks.

could consolidate

where is Mayotte is.?

citation/evidence?

citation/evidence? relevance? not sure this is needed here.

would use “analysis” rather than study the analysis is the study, right?

include dates

A statement about the purpose of the analysis would be helpful.

reword unless this is a causal relationship

avoid passive tense as much as possible

## 1 - Introduction

In the aftermath of a potentially destructive natural event, such as a powerful earthquake, tsunami, volcanic eruption, or major landslide, it is crucial to rapidly determine its key geophysical and geological characteristics. With such evidence-based understanding, the geoscientific community can credibly explain the phenomenon to the media and stakeholders. It can also disseminate the information to people directly affected by the disaster and eventually engage discussion with them (e.g., Stewart et al., 2018). A rapid understanding is also crucial to evaluate the risk of cascading events (e.g., triggered earthquakes), such as the 2016 central Italy earthquakes (Chiaraluce et al., 2017; Patton, 2016) and to direct further scientific actions. Decades ago, this understanding was achieved at a much slower pace and within closed research teams by a progressive acquisition of geophysical data and time-consuming field surveys. This process often took months to reach a good apprehension of the event’s characteristics. Thanks to worldwide geophysical instrumental networks (e.g., global and regional seismic networks) and satellites (e.g., optical or radar imagery), together with open data, researchers now generally have enough information to get a satisfactory first-order description of the geophysical event and an estimation of its consequences within days

Define pronouns as much as possible

not sure this is right. risk from? probability of?

understanding

what kinds of consequences?



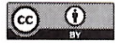

(e.g., Hayes et al., 2011). Scholarly interactions via social media, sometimes involving citizen expertise and observations, may transform both the timeliness and the way our geophysical understanding is built and shared (Hicks, 2019; Williams and Krippner, 2019).

65 Twitter stands as a very efficient and simple tool to publicly disseminate scientific information and rapidly engage <sup>in</sup> discussion about the <sup>cause?</sup> meaning and implications of geological events (Choo et al., 2015; Landwehr et al., 2016; Lee, 2019; Takahashi et al., 2015). Indeed, while Twitter is ~~perhaps~~ not the most popular social media platform – compared to e.g., Facebook (Fallou and Bossu, 2019; Williams and Krippner, 2019) – it is valued by scholars as an interactive and open way to discuss  
70 research-related issues and to comment on research results in a concise way (Shiffman, 2017; Van Noorden, 2014). Twitter is also widely used by journalists who can pass on information to a wider public (Engesser and Humprecht, 2015).

Here we take the examples of the <sup>Full date</sup> 2018 ~~M<sub>w</sub>~~ 7.5 Palu earthquake and tsunami in north-west Sulawesi, Indonesia (Bao et al., 2019; Socquet et al., 2019) and of the protracted 2018-2019 Mayotte island  
75 seismo-volcanic crisis in the Indian Ocean (Feuillet et al., 2019; Lemoine et al., 2019). We analyse the timelines of Twitter threads from these events to show that a virtual team of scholars sharing complementary data, observations and analyses, and engaging in subsequent discussions, may lead to a very rapid – one to a few days – co-building of knowledge. This process has the advantage of being transparent to the public – notably to the media, overpassing laboratory walls (Britton et al.,  
80 2019) – making science accessible to any non-academics or citizen scientists who can follow and participate in the discussion. It follows growing trends towards open science, and also potentially bears the opportunity for a new type of collaborative scientific approach within dynamic and remotely-working “global virtual teams” (Zakaria et al., 2004).

## 2- Studied events and methodology

85 For around a decade now, earthquake scientists have begun to use information extracted from social media, websites, or app earthquake reporting, to automatically detect and locate earthquakes within tens of seconds of their occurrence time (Bossu et al., 2008, 2018; Earle et al., 2010; Steed et al., 2019). Here, rather than relying on such a quantitative survey based on large-scale keywords or hashtags statistics, or website traffic analysis combined with geolocalisation, we build our study on  
90 the contextual analysis of qualitative content of selected Twitter conversational threads. Examples of recent geological events that have received extensive Twitter commentary are: the April 2015 Gorkha earthquake in Nepal (See analysis of Twitter response by Lomax et al., 2015), the Mexico

rewrite to eliminate hyphenated clause

Relevance of including this is not clear

what is the relevance of including these?

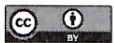

could eliminate parenthesis by including country in sentence: (cont.)  
earthquakes of September 2017, the Agung eruption of 2017 (Indonesia), the tsunami induced by volcanic collapse at Anak Krakatau (Indonesia) in December 2018, the July-August 2019 Stromboli eruptions and pyroclastic flows (Italy), the July 2019 Ridgecrest earthquake sequence (California, USA), and the protracted Lusi mud-volcano eruption (Indonesia). We chose to analyse two 2018 events that illustrate complementary aspects of knowledge building via social media.

On September 28, 2018 an earthquake of magnitude  $M_w$  7.5 occurred in north-west Sulawesi island, Indonesia. The earthquake ruptured the Palu-Koro fault system, a north-south left-lateral fault zone with a rapid average tectonic rate of about 4 cm/yr (Socquet et al., 2006) and previously identified to have a high seismic hazard (Pusat Studi Gempa Nasional - National Center for Earthquake Studies, 2017; Watkinson and Hall, 2017). It triggered a tsunami with run-ups reaching 6-8 m high on the Palu Bay coast (Carvajal et al., 2019; Ulrich et al., 2019), as well as widespread liquefaction and surface spreading inland (Valkaniotis et al., 2018; Watkinson and Hall, 2019). To show how key geophysical information was rapidly disseminated and discussed, we compiled the most informative tweets that were posted about the event's characteristics and processes. We used this compilation to build a timeline of the rapid progressive understanding of the earthquake rupture and of its effects. The timeline, which covers the five days following the event, is graphically shown in Figure 1 (see also Table S1) which also contains web links to selected relevant individual tweets). A Twitter "moment" (Lacassin, 2019) gives online access to the full content of the tweets including images, maps and videos (a PDF print of the full thread is also available on request to the corresponding author). Table S2 provides complementary web links to the Twitter feeds of several geo-scientists who actively participated in the online data dissemination and discussion in the few days following the event, giving access to secondary, more detailed discussions.

The case of Mayotte, in the Comoros archipelago between East Africa and Madagascar, is quite different: the island has been experiencing a long-standing seismic swarm of volcano-tectonic origin since May 2018 (Feuillet et al., 2019; Lemoine et al., 2019; Patton, 2018) but was not purported to have any significant seismic or volcanic hazard prior to this crisis. The seismic swarm is still active more than one year after its start, and has been recently linked to a migration of magma within the lithosphere and the eruption of an undersea volcano (Feuillet et al., 2019). We do not aim to analyse the full, >1 year long, Twitter activity related to the Mayotte seismic swarm, but we will focus on a peculiar long-period seismic event that happened on November 11, 2018 and triggered a surge in scholarly Twitter discussions in the following days. This surge resulted in a complex and long (>200 Tweets) Twitter thread with many branches opening secondary discussions, more like a wild bush than a well-structured tree. To simplify it, we have regrouped the

? does this mean rapid progress of understanding?

- is there a way to append this?

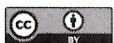

*use present or past tense rather than future tense - the work is done!*

130 most relevant tweets linked to these discussions into three successive Twitter moments accessible online (Lacassin, 2018a, 2018b, 2018c) and invite the reader to consult and refer to this long thread (as for Palu, a PDF print is available on request). We ~~will not~~ <sup>not do</sup> the same timeline analysis <sup>as</sup> for the Palu earthquake, but we <sup>rather</sup> will use the "Mayotte November 11, 2018 rumble event" example to <sup>the role of</sup> outline the implications for citizen scientists, the efficient knowledge building dialogue between scientists, some pitfalls inherent to Twitter informal use, and the opportunity to spread information toward more traditional print, broadcast and online media.

*more info needed on the nature of the analysis. what was done?*

*what is Twitter formal use?*

*caution against this word choice*

135 The aims of the two threads were quite different. With Palu, the scenario was quite well defined - an earthquake and tsunami, with the focus of scientists being to unravel the details. With Mayotte, there was literally nothing known at first other than that a long period signal had occurred. There was no location and no idea about what the signal was. This resulted in the Twitter exchanges and thread on Mayotte being more chaotic and open than the more linear Palu thread. There was also very different societal impact. Mayotte earthquakes caused unrest and stress, but no victims, while devastation and death was immediately seen in Palu.

*Try to keep order consistent - Palu first then Mayotte*

*victims can have a broader meaning than death or material loss*

140 Most authors of this paper contributed to the mentioned Twitter exchanges. Such an "embedded" view has the merit to provide an in-depth understanding of the geophysical observations and of the full context of related online exchanges at the time of the event. To provide an external, and more critical view, the paper also includes some authors (MD, LF) who were not involved in these specific Twitter discussions.

### 145 3 - Results: knowledge building and sharing via Twitter

#### 3.1 - The case of the 2018 Palu earthquake

The compilation of the Twitter exchanges following the Palu earthquake and tsunami reveals how <sup>was</sup> first-order understanding of event characteristics <sup>is</sup> rapidly gained within a few hours to one day, and a more complete one in less than a week.

150 The timeline built from the Twitter feeds (Figure 1, Table S1) shows that, already about 1 day after the earthquake, the geoscience community knew that:

- i) the earthquake happened on the Palu-Koro fault system, with a sharply localised strike-slip rupture directly beneath Palu City, and an epicenter located in the Minahasa peninsula on the north-east shore of the Palu Bay (from earthquake location and moment tensor solutions provided by monitoring agencies, published papers on the seismotectonic context and regional

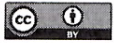

Is this a commonly used term? If not, use, e.g., "pre- and post-event"

- 160 fault mapping; this information was shared via Twitter in the 2 hours following the event);
- ii) the rupture entered Palu Bay, but the geometry of its prolongation offshore toward the Minahasa peninsula was uncertain (from early post-earthquake satellite imagery and preliminary ante-post image correlation);
- 165 iii) the aftershock zone extended ~150 km in the north-south direction, and the mainshock hypocenter was located near its northern tip (from operational earthquake locations provided by monitoring agencies);
- iv) a tsunami with run-ups of several meters hit the shores of the Palu Bay only (from reports and videos shared via social media by local people, and the tide gauge records that were available in the hours following the event);
- v) there was dramatic surface spreading and liquefaction in and south-east of Palu City (from photos and videos shared by locals).

this evidence shows that it hit Palu Bay, but not that it didn't hit anywhere else. If this is what you meant, be more explicit.

who is the community?

170 The exchanges and discussions continued via Twitter and by 5 days after the earthquake the community had assembled a fairly accurate description of the event and its effects. The acquired common knowledge was that:

- i) the earthquake ruptured two strands of the Palu-Koro fault system for a total length of ~150 km (from aftershocks distribution provided by monitoring agencies, radar and optical image analysis results, <sup>and</sup> early earthquake source models);
- 175 ii) the strand south of Palu Bay had a sharp and extremely localized surface rupture with sinistral offsets of ~5 m (from satellite imagery and state-of-the-art ante-post image correlation, later confirmed by field observations posted on Twitter by Indonesian researchers ~15 days after the event);
- iii) the rupture started on an inland fault east of Palu Bay, then crossed Palu City from North to South (from satellite and InSAR imagery, and early earthquake source models);
- 180 iv) the earthquake rupture propagated unilaterally southward, likely at a supershear speed (faster than S waves), a fairly unique observation for earthquakes (from early earthquake source duration and rupture length estimates, the latter based first on the distribution of early aftershocks, then on satellite images);
- 185 v) massive liquefaction and lateral spreading occurred in several sectors of Palu City (from aerial video footage shared by local government agencies, satellite imagery, photos and videos shared by locals on social media).

state-of-the-art

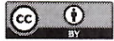

vi) tsunami waves hit the Palu Bay coast only <sup>2</sup> few minutes after the earthquake (from tide gauge records and videos shared on social media).

this wasn't know the first day?

190 Ensuing Twitter exchanges during the next weeks focussed on the surface rupture description in the field by Indonesian scientists, the bathymetry of Palu Bay, the possible fault geometry across it, and hypotheses about the tsunami source (was it due to the seismic rupture itself or to underwater landslides and coastal collapse, or a combination of the two?)

195 In this process of common knowledge building, geoscientists used a diverse range of data types that were openly shared and discussed on Twitter: published papers and maps about the seismotectonic context, teleseismic data, local seismic waveforms, high resolution optical satellite images, Synthetic Aperture Radar (SAR) satellite <sup>data</sup> analysis, tide-gauge records, and field observations. Data sharing and social interaction via Twitter appeared as a good way to put together complementary skills and expertise and to get feedback from fellow researchers on early scientific ideas. The satellite image correlation results, available on Twitter 1-2 days after the earthquake, were ~~then~~ rapidly shared as a more formal report via the open repository zenodo.org (Valkaniotis et al., 2018). Some ideas and initial hypotheses about a supershear rupture and about the offshore fault geometry in Palu Bay, both discussed on Twitter, enhanced the impetus for accelerated development of in-depth scientific papers (Bao et al., 2019; Ulrich et al., 2019). Indonesian geoscientists, absent from the earlier scholarly exchanges on Twitter (only official agencies were providing advice), 205 progressively joined the discussion, providing for example tide gauge records and field observations of fault surface rupture and offsets. This ~~potentially~~ <sup>see comment</sup> creates the opportunity for developing new international collaborations. Further highlighting the interest of social media, the analysis of the tsunami source by Carvajal et al. (2019) was enabled by videos posted on social media platforms and ~~often~~ shared via Twitter.

what is the point you want to make by including this?

"from both science groups and local residents"? (if that's the case, might want to add that in)

potentially + opportunity are essentially redundant, as both are uncertain/conditional

210 The spread of information via Twitter was not restricted to a small group of geoscience scholars, reporters used and quoted these Twitter discussions in their articles (e.g., Andrews, 2018b; Wei-Haas, 2018b). Also, journalists used the Twitter feed to identify academic experts to interview. However, some journalists did not appear to be interested by the full range of geophysical observations, but focussed on the possible tsunami source and on the issue of a "failed tsunami alert" (Fountain, 2018; Wright, 2018), which disagrees with scientific evidence, as has been explained by geoscientists on Twitter (Figure 2), then in the media (e.g., Morin, 2018). Indeed, there were inaccurate reports in international media outlets about a "failed" tsunami warning. The media were rather quick to blame the Indonesians, but geoscientists realised that there was not

example? evidence?

what disagreed? be more specific

I didn't realize these were examples of erroneous reporting just from reading the text (I had to look at the refs.) - be more explicit

↑ for...? example would be helpful

↓ how quickly? before articles were written? (make this clear)

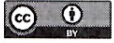

220 enough time to issue a warning given the very short distance between the earthquake source and the areas exposed to <sup>the</sup> tsunami in Palu Bay (Figure 2). This process of fact-checking took only a few hours, on 2018 October 1st, between publication of the Associated Press dispatch (Wright, 2018) and critical explanation given by scholars on Twitter.

remind us where this is in the timeline (how long after the eq)

what dispatch? This is commented on in Fig. 2 but not clearly here in the text.

### 3.2 - The Mayotte Nov 11, 2018 rumble event

225 On November 11, 2018, more than 6 months after the start of an earthquake swarm, a peculiar seismic signal radiated from the region of Mayotte and was recorded worldwide by seismic networks, but not detected by their automatic event identification algorithms because of its odd spectral characteristics. It was an unusually long, low frequency, highly monochromatic signal, like a low-pitched hum ~~that travelled as seismic waves across the Earth~~. Its interpretation still remains somewhat mysterious, but it is certainly related <sup>with</sup> the ongoing volcano-tectonic crisis.

where?

interpretation or source?

230 As noted by journalist Maya Wei Haas in her <sup>what Nat. Geo. article?</sup> National Geographic article, “only one person noticed the odd signal on the U.S. Geological Survey’s real-time seismogram displays. An earthquake enthusiast [...] saw the curious zigzags and posted images of them to Twitter” (Wei-Haas, 2018a). Then it was retweeted by a citizen earthquake researcher, Jamie Gurney, who initiated an active discussion between academic researchers, with some interactions from the media and the public.

235 Analysis of openly-accessible seismic waveform data from around the world by seismologists then confirmed the signal originated in the Mayotte region (e.g., Hicks, 2018b).

screen shot could be helpful here - I'd like to see how this began

The exchanges <sup>commanding</sup> involved both seismologists and other geoscientists to eventually co-build a rapid appraisal of the November 11 signal and of its broader geophysical and geological context. The dynamic and acute nature of the researchers' interactions are exemplified by the three successive Twitter moments (Lacassin, 2018a, 2018b, 2018c) that regroup the more significant tweets. A simple contextual analysis of the selected tweet thread, illustrated by the two successive word clouds in Figure 3, shows how the exchanges started with questions about the odd seismic signal itself – words: *signal, event(s), wave(s), seismic, frequency* – and its geographic origin – words: *Mayotte, location* (Figure 3a), then moved to a discussion more focused on the event's geophysical source – words: *source, signal, CMT, CLVD, deformation* – and data processing – words: *data, model, InSAR, inversion* (Figure 3b). While many things remain to be understood about the geophysical processes at work offshore Mayotte, the preliminary waveform modelling shared via Twitter (Hicks, 2018a) and the related discussion resulted in the consensus hypothesis that the Nov. 11 seismic event was due to a deflation event in a large and deep magmatic chamber combined with

what makes them dynamic?

you've said this was more of a bush than a thread... or maybe it did all start in one place?

could reword this to eliminate hyphens, break into multiple sentences

→ right word? or signal? May need to reword the

sentence bc you mix source processes w/ signal effects

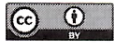

250 resonance and amplification of the seismic waves. This early hypothesis discussed on Twitter was subsequently supported by later in-depth analyses (Cesca et al., 2019; Feuillet et al., 2019; Lemoine et al., 2019).

Before the November 11 event, the long-standing earthquake swarm in Mayotte was largely ignored by the worldwide geoscience community; the swarm was studied by only a few researchers, mainly  
255 French, because Mayotte is a French territory. As noted by Lemoine et al. (~~Lemoine et al.~~, 2019), the November 11 event “awakened the interest of the seismological community and the media”. We understand that the rapid “explosion” of the informal Twitter discussions we report played a pivotal role in this awakening and helped hastening ~~ing~~ needed research in the region (Hicks, 2019). A few days after the November 11 event, at a meeting between the French geoscience community and  
260 stakeholders (funding agencies, ~~and~~ ministry representatives) ~~the~~ Twitter exchanges were used to demonstrate the urgency in funding research and surveys on the Mayotte earthquake swarm (N. Feuillet, personal communication to RL).

The full interactive process on Twitter was ~~qualified~~ <sup>described?</sup> by SH ~~of~~ <sup>as</sup> “new age science” (hashtag #newagescience) and “*excellent citizen-scientist engagement*”, and many other users outlined the  
265 quality of the discussion (Figure 4). It was the subject of two long articles in National Geographic (Wei-Haas, 2018a) and Gizmodo (Andrews, 2018a), themselves used as primary sources by other media, and stimulated stand-alone reports in more traditional news organisations (e.g., Sample, 2018).

The long thread about the Mayotte Nov. 11 seismic event reveals the efficiency of knowledge  
270 building via scholarly online interactions, but it also outlines some pitfalls that are inherent to the informal aspect of exchanges via Twitter. The “bushy” nature of the thread, with many secondary discussions, makes it difficult to follow and ~~apprehend~~ <sup>comprehend</sup> in real time, and summarising it *a posteriori* is challenging. Also, some of these secondary discussions were casual or humorous, and were at risk of being seen as insensitive and taken out of context by the general public - in particular, those  
275 living in Mayotte where the scientific culture is low and animism belief is strong among a fringe of the population (Fallou and Bossu, 2019). In this case, the mention of a “sea monster” as being the culprit for the seismic hum is easily seen by some as harmless humour amongst experts, but such jokes may be easily misread by others.

what does this mean?  
speculative?

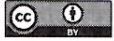

## 280 4 - Discussion: advantages and pitfalls of Twitter for knowledge exchange and co-building

### 4.1 - Argument 1 – Very rapid co-building of knowledge

The two case studies described above support previous work showing that Twitter allows a rapid building of knowledge (e.g., Choo et al., 2015; Hicks, 2019). In the case of the 2018  $M_w$  7.5 Palu earthquake, it took only 5 days to obtain a detailed description of the events and only a few days for the Nov 11, 2018 seismo-volcanic event in Mayotte. It takes several months to several years for scientific teams to gather relevant information, analyse it, and publish it in an academic journal after a long review-revision process. Using Twitter thus makes information and basic explanations accessible to the scientific community and to the public more quickly. Communicating such ideas to the public may have high impact in places where operational infrastructure and associated communication are limited. Moreover, Twitter may provide direct and early scientific information for researchers, without any geographical and institutional barriers, acting as a "science newsfeed", which can be used to plan further in-depth research.

*curious about what kind of impact + evidence*

However, the knowledge built via Twitter is not exactly comparable to the knowledge built in a more long-term academic approach. Even if a long practice allows scientists to estimate the quality of a dataset or of a reasoning almost immediately, it does not substitute peer review as a process to check the validity of a result and 'establish' knowledge. A question therefore arises over the credibility of the knowledge built rapidly and without peer-review via Twitter. Questions over the legitimacy of that knowledge also arise. Who are qualified to speak? Do they have experience in a certain region and tectonic setting? Are they from a reputable academic institution? The contributions of recognised scientists from acknowledged institutions might be taken as gospel by a non-expert public. The issue of "what makes a credible scientist?" is however more complex. As shown in the Mayotte example, non-practising researchers and "hobby scientists" can also develop a good scientific understanding and be fully legitimate to discuss these topics. Nevertheless, Twitter discussions amongst a large group of diverse geoscientists can help with refinement of ideas/hypotheses, and to show outward-facing credibility for these.

*what is the difference here between credibility + legitimacy?*

*I don't feel this was demonstrated in the analysis or figures. A figure or clear example (w/ quotes) would help.*

*is this starting a different idea?*

*? clarify  
precise rather than colloquial language would be better  
- is this good? bad? problematic?  
more complex than what?*

*how is this idea supported in the analysis?*

A risk to sharing "breaking science" information on Twitter and social media is that this same information can enable publications by the global community before the local scientists who provided the initial and trending information. There are vulnerabilities for those field teams who are committing resources as part of a response initiative, and are required to, or feel a duty to provide



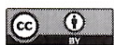

310 timely public information about an event. Elements of such a scenario unfolded following the 2016  
Kaikōura earthquake in New Zealand, when tweets, blog posts and media releases were an  
important information source for an early publication that predated, by several months, publications  
of field observations and analysis by teams on the ground. This example raises questions about the  
ownership of scientific knowledge that is shared in the public domain, and suggests that some  
caution should be exerted when posting to Twitter or other social media. \*

*by someone  
not at  
the responding  
agency?*

*from whom?*

*curious: by agencies posting? or by researchers*

#### 4.2 - Argument 2 – Outside the laboratory walls

Twitter enables getting outside the laboratory walls in many ways. First, it opens the door to  
professional networking and new academic collaborations between scientists coming from different  
disciplines, institutions or even countries. In the case of the Palu earthquake, Indonesian  
geoscientists joined the discussion to provide data that could only be acquired locally. This led them  
to engage in a discussion with members of the international scientific community and paved the  
way for new collaborations, such as sharing of tsunami source models for operational hazard  
analyses. In the short term, however, it might be difficult for local scientists to get involved in social  
media if they are busy with the management of the crisis and/or collecting the first information from  
the field. Also, scientists from local monitoring organisations or universities may have strict social  
media usage and communication policies, and must sometimes use validated language elements ?  
(this was partly the case for French geoscientists after the discovery of the new volcano offshore  
Mayotte in May 2019).

*wanting to use that  
info?  
(or both?)*

*The former  
implies  
less open  
science*

Twitter also opens the door to exchanges with the global public. The scientific value of  
contributions from non-academics varies between examples, but there are always some external  
inputs that help clarify or reframing the scientific questions and the way to explain them to the ?  
public. Non-academics can be the ones launching important discussions. In the case of Mayotte, it  
was a citizen scientist who warned of a strange seismic signal and it was the "explosion" of informal  
Twitter discussions that woke up the scientists and the authorities (Lemoine et al., 2019; Hicks,  
2019). Among Twitter users, journalists "listening in" are particularly important as they can pass on  
some of the scientific content of the discussions in an understandable way. The challenge for them  
is to have access to information that is as fresh as it is credible. From this point of view, Twitter is  
an important resource because it can serve as a pool of potential experts to give in-depth comment.  
On the other hand, perhaps this trend reduces the diversity in these pools, with public comment  
favouring scientists on Twitter rather than those who avoid social media or use other platforms.  
Also, how much checking does a journalist do to assess a tweeter's scientific credibility?

*drew attention  
to ?*

*\**

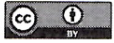

#### 4.3 - Argument 3 – Opening the scientific process to the public

The process of knowledge-building on Twitter is open and public, which can help to improve the general public's and the media's understanding of how scientific research works. The above  
345 examples make clear that the process of knowledge co-construction is not linear. Some discussion threads might look like well-structured "trees" (e.g. the Palu earthquake) but others resemble "wild bushes" with many secondary branches of discussions opening up over time (e.g. the Mayotte seismo-volcanic crisis). Scientists are seen using a wide variety of data and following indirect, non-chronological and unstructured thought paths before reaching a conclusion. As a window on the  
350 scientific process, Twitter also helps to make clear that the scientific work is organised in disciplines and subdisciplines, whose knowledge and know-how may be difficult to articulate but which are all necessary to build a global view of a subject. Scientists themselves are familiar with these aspects of their work but non-scientists are not because scientific knowledge is often presented retrospectively as having been constructed in a cumulative and chronological manner.  
355 Epistemologists have long denounced this misconception (e.g., Kuhn, 1996). Twitter can contribute to make the "messy part of science" more tangible. Early information on Twitter can also provide excellent teachable material for educators. One limitation is that the thread has to be "visible" on Twitter, using a proper #hashtag for instance. Also, if the public is not aware of the sphere and the discussion is not "visible" to them, they just won't see it even though it's public.

*substantiated?  
or use "may"*

*example?  
does this  
come up in,  
or can you  
make this  
point  
clearer in  
your analysis?  
  
in what way?*

#### 360 4.4 - Argument 4 : A new type of scientific approach within "global virtual teams" (Zakaria et al. 2004) ?

Can instruments such as Twitter contribute to the emergence of a new type of scientific collaboration within "global virtual teams" (Zakaria et al. 2004)? This raises a number of questions among which is what do we acknowledge as being scientific. So far, academic scientific knowledge  
365 is validated through a rigorous process of peer review. This process does not need to be perfect - it is not - but it has the advantage of being shared collectively, and can thus play its role of filter between "good" or "bad" science. Peer review is deeply rooted in scientific culture. Scientific institutions derive their credibility and legitimacy from the estimated quality of the work published by their researchers and researchers gain visibility and financial support by belonging to well-  
370 established institutions. Platforms such as Twitter allow a more spontaneous building of knowledge which, to be credible, must involve some form of peer review but in a much less formal way. Rapid dissemination of early scientific analysis products (for example using up-to-date remote sensing data) to scientists working in the field is another aspect of using social media platforms. Early

*New #?  
Is this a  
different  
point?*

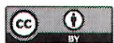

375 sharing of scientific results, preprints or manuscripts submitted to open peer-reviewed journals can  
provide a good way of getting feedback and help with the peer-review process. Twitter interaction  
now is also forming the basis of collaborations, leading to the development of ideas and subsequent  
co-writing of papers within diverse, multi-disciplinary teams (e.g., Hicks et al., 2019; Ulrich et al.,  
2019 included coauthorships that were instigated from Twitter discussions).

#### 4.5 - Argument 5 : Helping people to understand hazards and risk mitigation

380 In "real" life, openness and spontaneity following a newsworthy event are always of great value,  
especially when the development of scientific theories and hypotheses turns into an interesting  
story. Improving people's understanding of natural phenomena can help to improve risk mitigation,  
at least indirectly. Take the case of the Palu earthquake, for example. International media insisted  
on a "failed" tsunami warning but scientists quickly realized and explained that there was not  
385 enough time to issue an efficient alert because of the proximity of the earthquake (see above). In  
fact, the Indonesian agency in charge (BMKG) issued an alert few minutes after the event and  
released it ~30 minutes later (Fig. 1, Table 1); in the meantime the tsunami hit the Palu Bay coasts  
(Krippner, 2018). Later on the same day, BMKG issued a press release to explain their alert  
management process. This contradictory information is likely to open a debate that will improve the  
390 general public's understanding of what to expect (or not) from early warning systems. More  
generally, by bringing facts and evidence-based arguments into the public debate, the scientific  
community can contribute to the quality of people's information and, in the long-term, help to get  
better prepared. Twitter discussions are opportunities to prevent confusion and misunderstanding by  
reinforcing and disseminating information and advice given by local government agencies (Bartel  
and Bohon, 2019).  
395

*what does it mean to release it? How is that different than issuing it?*

*refer to specific section*

*what contradictory information?*

*help whom?*

*to whom?*

### 5 - Concluding remarks

Using examples of Twitter discussions following two very different geophysical events, we have  
shown that open scientific discussion and hypothesis-building on social media can promote and  
enhance many key aspects of modern science. These include: development of ideas for future  
400 project funding, early dissemination and discussion of preliminary results forming the basis of peer-  
reviewed publications, networking for developing international collaborations, demonstrating  
impact of research, and public dissemination of research and results. Twitter can be seen as a  
modern method of crowdsourcing scientific ideas; however, this can raise moral issues over the  
proper acknowledgement of how these ideas were progressively developed.

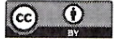

405 Much of the Twitter discussions we have shown do not represent a significant change over the  
common methods adopted in traditional scientific research. For example, scientific discussions on  
Twitter may be compared to traditional in-lab scholar discussions at coffee time and encounters at  
scientific conferences and workshops that are a usual way to exchange information and new ideas.  
Twitter democratises such scholarly interactions <sup>by...</sup> and expands their interdisciplinarity and  
410 geographic coverage, leading to more diverse scientific inputs. Much of these differences result  
from an increase in open data, willingness to openly share ideas, and the globalism of science.  
Moreover, in the examples described in this paper, the group of scientists involved in the  
discussions had not worked together before. They formed a group with a diverse range of  
backgrounds and with different expertise, questioning previous tweets, providing an effective and  
415 rapid analogue to traditional peer review.

*globalization?*

*L would be helpful to have an example*

Nevertheless, there are key differences compared to the traditional scientific method that we should  
be wary of. Whilst we have demonstrated that the use of Twitter for scientific knowledge-building  
and dissemination can be a fulfilling experience, the immediate tangible benefits for scientists that  
may be needed for e.g. career progression may not be obvious. For example, PIs and managers less  
420 accustomed to science on social media may find such efforts to be a distraction from traditional  
research work. The current academic system rewards scientists mostly based on peer-reviewed  
work, so how can scientists be rewarded for such public dissemination and preliminary ground-  
work? What happens if research papers are published which use the scientific ideas developed on  
Twitter without appropriate credit? How can credit be given to the incremental development of  
425 scientific ideas from Twitter?

*work, or  
more specifically  
publications?*

*This is a new/different idea. Introduce of "Also," or an intro sentence*

Since science on Twitter is carried out fully in the public domain, we should be wary of comments  
being taken out of context, and the potential for posts "going viral". As a Twitter user gains  
followers, their responsibility and the risk of such issues dramatically increases, and as the number  
of comments/replies from followers grow, so does the time required to reply responsibly. In such  
430 cases, should this public-facing approach be left to social media and public relations experts?  
Alternatively, should media and communication training become a standard for scientists working  
in fields with public-facing aspects?

Aside from occasional conspiracy theorists and charlatan earthquake / volcanic eruption predictors,  
we have found from our experience of Twitter that communicating about natural geohazards can be  
435 less affected than other topics by the well-recognized disadvantages of the platform - such as  
trolling, personal abuse, etc. However, challenges still remain for the scientific discussion and

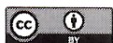

dissemination of more controversial subjects, such as human-induced seismicity, petroleum science,  
or climate change. Does exposing the “messy part of science” (see above) ~~to the public~~ help to  
increase <sup>public</sup> trust in scientific evidence, or to reduce trust? For example, it might be possible for some  
440 people to clearly see the uncertainty in some scientific arguments and to “prey” on them for  
political gains. Future development of “best” practices for scientists involved in such subjects will  
be needed. But offering communication training is only one step toward supporting scientists in  
effective conveyance of their work. Current issues like climate change show us that scientists need  
to be openly communicating and building trusting relationships with global communities but the  
445 response from other scientists can be hostile and damaging. We need to specifically acknowledge  
and reward scientists for these crucial efforts, and keep working to change the culture to support  
science communicators.

Together with the growing popularity of open science and preprint archives, discussing of science  
on Twitter can importantly fill in the traditional “radio silence” from science between a  
450 newsworthy/impactful event and the publication of related scientific papers that follow months to  
years later. Our study has specifically focussed ~~on~~ potentially hazardous geological events, but our  
experiences reported here can assist the usage of social media for many other fields of research.

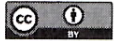

## Supplementary Information

455 Table S1 lists main geophysical events, and informations<sup>s</sup> shared via Twitter after the Palu event, with links toward<sup>s</sup> relevant tweets. Table S2 provides web links to Twitter feeds of geoscientists who participated in the online data dissemination and discussion after the Palu event.

*Would be better to have Table S1 as part of the manuscript.*

## Author Contribution

460 This paper follows exchanges on Twitter <sup>s</sup>to<sup>s</sup> which most authors participated after <sup>the</sup> Palu and/or Mayotte event. JG<sup>s</sup>, DW<sup>s</sup>, as citizen scientists, alerted the scientific community about the Mayotte Nov. 11 event (JG) or translated Indonesian geohazard information in english (DW). RL conceived the study, compiled and analysed the data. All authors commented on the results. RL, MD, SH wrote the paper with inputs<sup>s</sup> from all other authors, listed in alphabetical order.

*The full PDFs of discussions should be available as supplementary info.*

## Competing Interest

The authors declare that they have no conflict<sup>s</sup> of interest.

## 465 Acknowledgements

This paper is a collaborative study following Twitter discussions between co-authors. It is dedicated to the late Sutopo Purwo Nugroho, former chief spokesman of the Indonesia disaster mitigation agency, for his open communication toward the public, in particular via Twitter. RL has his position funded by CNRS (Centre National de la Recherche Scientifique). Part of this research was 470 performed at the Jet Propulsion Laboratory, California Institute of Technology under contract with the National Aeronautics and Space Administration. This study contributes to the IdEx Université de Paris ANR-18-IDEX-0001. This is IGP contribution n° xxxx.

*→ does it have a name?*

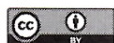

## References

- 475 Andrews, R. G.: Geologists Joke About “Sea Monster” After Mysterious 30-Minute Rumble Emanates from Waters Near Madagascar, Gizmodo [online] Available from: <https://gizmodo.com/geologists-joke-about-sea-monster-after-mysterious-30-m-1830738921> (Accessed 5 July 2019a), 2018a.
- Andrews, R. G.: Indonesian Tsunami: What Happened, How To Survive One. And How To Help, Forbes, 1st October [online] Available from: <https://www.forbes.com/sites/robinandrews/2018/10/01/indonesian-tsunami-what-happened-how-to-survive-one-and-how-to-help/> (Accessed 5 July 2019b), 2018b.
- 480 Bao, H., Ampuero, J.-P., Meng, L., Fielding, E. J., Liang, C., Milliner, C. W. D., Feng, T. and Huang, H.: Early and persistent supershear rupture of the 2018 magnitude 7.5 Palu earthquake, *Nature Geoscience*, 12(3), 200–205, doi:10.1038/s41561-018-0297-z, 2019.
- 485 Bartel, B. and Bohon, W.: The Hazards of Hazard Communication: Importance, Rewards, and Challenges of Science in the Public Sphere: A white paper summary of presentations from session PA23B at the 2018 Fall Meeting of the American Geophysical Union. [online] Available from: [https://www.iris.edu/hq/files/Science\\_Highlights/Hazards\\_of\\_Hazard\\_Communication\\_White\\_Paper\\_2019.pdf](https://www.iris.edu/hq/files/Science_Highlights/Hazards_of_Hazard_Communication_White_Paper_2019.pdf), 2019. *access date*
- Bossu, R., Mazet-Roux, G., Douet, V., Rives, S., Marin, S. and Aupetit, M.: Internet Users as Seismic Sensors for Improved Earthquake Response, *Eos, Transactions American Geophysical Union*, 89(25), 225–226, doi:10.1029/2008eo250001, 2008.
- 490 Bossu, R., Roussel, F., Fallou, L., Landès, M., Steed, R., Mazet-Roux, G., Dupont, A., Frobert, L. and Petersen, L.: LastQuake: From rapid information to global seismic risk reduction, *International Journal of Disaster Risk Reduction*, 28, 32–42, doi:10.1016/j.ijdr.2018.02.024, 2018.
- Britton, B., Jackson, C. and Wade, J.: The reward and risk of social media for academics, *Nat Rev Chem*, 3(8), 459–461, doi:10.1038/s41570-019-0121-3, 2019.
- 495 Carvajal, M., Araya-Cornejo, C., Sepúlveda, I., Melnick, D. and Haase, J. S.: Nearly Instantaneous Tsunamis Following the Mw 7.5 2018 Palu Earthquake, *Geophys. Res. Lett.*, 12, 200, doi:10.1029/2019GL082578, 2019.
- Cesca, S., Letort, J., Razafindrakoto, H. N. T., Heimann, S., Rivalta, E., Passarelli, L., Isken, M., Petersen, G., Cotton, F. and Dahm, T.: Very long period signals and seismic swarm activity offshore Mayotte, Comoro Islands, in *Geophysical Research Abstracts*, pp. Vol. 21, EGU2019–8455–3., 2019.
- 500 Chiaraluce, L., Di Stefano, R., Tinti, E., Scognamiglio, L., Michele, M., Casarotti, E., Cattaneo, M., De Gori, P., Chiarabba, C., Monachesi, G., Lombardi, A., Valoroso, L., Latorre, D. and Marzorati, S.: The 2016 Central Italy Seismic Sequence: A First Look at the Mainshocks, Aftershocks, and Source Models, *Seismol. Res. Lett.*, 88(3), 757–771, doi:10.1785/0220160221, 2017.
- 505 Choo, E. K., Ranney, M. L., Chan, T. M., Trueger, N. S., Walsh, A. E., Tegtmeier, K., McNamara, S. O., Choi, R. Y. and Carroll, C. L.: Twitter as a tool for communication and knowledge exchange in academic medicine: A guide for skeptics and novices, *Med. Teach.*, 37(5), 411–416, doi:10.3109/0142159X.2014.993371, 2015.
- Earle, P., Guy, M., Buckmaster, R., Ostrum, C., Horvath, S. and Vaughan, A.: OMG Earthquake! Can Twitter Improve Earthquake Response?, *Seismol. Res. Lett.*, 81(2), 246–251, doi:10.1785/gssrl.81.2.246, 2010.
- 510 Engesser, S. and Humprecht, E.: Frequency or Skillfulness: How professional news media use Twitter in five Western countries, *Journalism Studies*, 16(4), 513–529, doi:10.1080/1461670X.2014.939849, 2015.
- Fallou, L. and Bossu, R.: Taking into account the cultural context to improve scientific communication – Lessons learned from earthquakes in Mayotte, *EGU Seismology* [online] Available from: <https://blogs.egu.eu/divisions/sm/2019/03/08/taking-into-account-the-cultural-context-to-improve-scientific-communication-lessons-learned-from-earthquakes-in-mayotte/> (Accessed 30 August 2019), 2019.
- 515 Feuillet, N., Jorry, S. J., Crawford, W., Deplus, C., Thion, I., Jacques, E., Saurel, J. M., Lemoine, A., Paquet, F., Daniel, R., Gaillet, A., Satriano, C., Peltier, A., Aiken, C., Foix, O., Kowalski, P., Laurent, A., Beauducel, F., Grandin, R., Ballu, V., Bernard, P., Donval, J. P., Geli, L., Gomez, J., Guyader, V., Pelleau, P., Rinnert, E., Besançon, S., Bertil, D., Lemarchand, A. and Van der Woerd, J.: Birth of a large volcano offshore Mayotte through lithosphere-scale rifting,

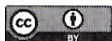

- submitted, 2019.
- 520 Fountain, H.: Indonesia Tsunami's Power After Earthquake Surprises Scientists, New York Times, 30th September [online] Available from: <https://www.nytimes.com/2018/09/30/world/asia/indonesia-tsunami-science.html> (Accessed 5 September 2019), 2018.
- Hayes, G. P., Earle, P. S., Benz, H. M., Wald, D. J., Briggs, R. W. and the USGS/NEIC Earthquake Response Team: 88 Hours: The U.S. Geological Survey National Earthquake Information Center Response to the 11 March 2011 Mw 9.0 Tohoku Earthquake, *Seismol. Res. Lett.*, 82(4), 481–493, doi:10.1785/gssrl.82.4.481, 2011.
- 525 Hicks, S.: Tweet about preliminary CMT inversion, Twitter [online] Available from: [https://twitter.com/seismo\\_steve/status/1065976362253647874](https://twitter.com/seismo_steve/status/1065976362253647874) (Accessed 15 July 2019a), 2018.
- Hicks, S.: Tweet - Low-frequency seismic rumblings originated close to the island of Mayotte, Twitter [online] Available from: [https://twitter.com/seismo\\_steve/status/1062042619264581633](https://twitter.com/seismo_steve/status/1062042619264581633) (Accessed 1 October 2019b), 2018.
- 530 Hicks, S.: Geoscience analysis on Twitter, *Nat. Geosci.*, 3, 682, doi:10.1038/s41561-019-0425-4, 2019.
- Hicks, S. P., Verdon, J., Baptie, B., Luckett, R., Mildon, Z. K. and Gernon, T.: A Shallow Earthquake Swarm Close to Hydrocarbon Activities: Discriminating between Natural and Induced Causes for the 2018–2019 Surrey, United Kingdom, Earthquake Sequence, *Seismol. Res. Lett.*, doi:10.1785/0220190125, 2019.
- Krippner, J.: Timeline of BMKG tsunami warning, Twitter [online] Available from: <https://twitter.com/janinekrippner/status/1046728583627108354> (Accessed 9 October 2019), 2018.
- 535 Kuhn, T. S.: *The Structure of Scientific Revolutions*, University of Chicago Press. [online] Available from: [https://books.google.com/books/about/The\\_Structure\\_of\\_Scientific\\_Revolutions.html?hl=&id=xnjS401VuFMC](https://books.google.com/books/about/The_Structure_of_Scientific_Revolutions.html?hl=&id=xnjS401VuFMC), 1996.
- Lacassin, R.: Mayotte earthquake swarm, discussion 2018 mid November, Twitter [online] Available from: <https://twitter.com/i/moments/1062037784909832192> (Accessed 4 July 2019c), 2018a.
- 540 Lacassin, R.: 2/n Mayotte earthquake swarm, 2nd part of discussion - 2018 mid Nov, Twitter [online] Available from: <https://twitter.com/i/moments/1064977870529925121> (Accessed 4 July 2019a), 2018b.
- Lacassin, R.: 3/n Mayotte earthquake swarm, 3rd part of discussion..., Twitter [online] Available from: <https://twitter.com/i/moments/1067410879233368065> (Accessed 4 July 2019b), 2018c.
- 545 Lacassin, R.: Palu earthquake – Co-building knowledge timeline, Twitter [online] Available from: <https://twitter.com/i/moments/1073575303979692032> (Accessed 3 July 2019), 2019.
- Landwehr, P. M., Wei, W., Kowalchuck, M. and Carley, K. M.: Using tweets to support disaster planning, warning and response, *Saf. Sci.*, 90, 33–47, doi:10.1016/j.ssci.2016.04.012, 2016.
- Lee, J.-S. M.: How to use Twitter to further your research career, *Nature*, doi:10.1038/d41586-019-00535-w, 2019.
- 550 Lemoine, A., Bertil, D., Roullé, A. and Briole, P.: The volcano-tectonic crisis of 2018 east of Mayotte, Comoros islands, *EarthArXiv*, doi:10.31223/osf.io/d46xj, 2019.
- Lomax, A., Bossu, R. and Mazet-Roux, G.: Real-Time Science on Social Media: The Example of Twitter in the Minutes, Hours, Days after the 2015 M7.8 Nepal Earthquake, in 2015 AGU Fall Meeting, AGU. [online] Available from: <https://agu.confex.com/agu/fm15/meetingapp.cgi/Paper/77222> (Accessed 7 October 2019), 2015.
- 555 Morin, H.: Indonésie : polémique « vaine » sur le système d'alerte tsunami, *Le Monde*, 1st October [online] Available from: [https://www.lemonde.fr/sciences/article/2018/10/01/indonesie-polemique-vaine-sur-le-systeme-d-alerte-tsunami\\_5362931\\_1650684.html](https://www.lemonde.fr/sciences/article/2018/10/01/indonesie-polemique-vaine-sur-le-systeme-d-alerte-tsunami_5362931_1650684.html) (Accessed 5 September 2019), 2018.
- Patton, J. R.: EarthquakeReport Italy, Twitter [online] Available from: [https://twitter.com/patton\\_cascadia/status/792868409734291457](https://twitter.com/patton_cascadia/status/792868409734291457) (Accessed 8 October 2019), 2016.
- 560 Patton, J. R.: EarthquakeReport offshore of Madagascar, the Comoros Archipelago, Mayotte, Twitter [online] Available from: [https://twitter.com/patton\\_cascadia/status/996465298680115200](https://twitter.com/patton_cascadia/status/996465298680115200) (Accessed 8 October 2019), 2018.
- Pusat Studi Gempa Nasional - National Center for Earthquake Studies: Peta Sumber dan Bahaya Gempa Indonesia



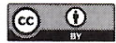

- Tahun 2017. Pusat Litbang Perumahan dan Pemukiman, Bandung, Indonesia. [online] Available from: <http://geotek.lipi.go.id/wp-content/uploads/2018/02/BUKU-PETA-GEMPA-2017.pdf>, 2017.
- 565 Sample, I.: “Magma shift” may have caused mysterious seismic wave event, *The Guardian*, 30th November [online] Available from: <http://www.theguardian.com/science/2018/nov/30/magma-shift-mysterious-seismic-wave-event-mayotte> (Accessed 15 July 2019), 2018.
- Shiffman, S. D.: The Benefits of Twitter for Scientists, *American Scientist* [online] Available from: <https://www.americanscientist.org/blog/macroscope/the-benefits-of-twitter-for-scientists> (Accessed 29 August 2019), 2017.
- 570 Socquet, A., Simons, W., Vigny, C., McCaffrey, R., Subarya, C., Sarsito, D., Ambrosius, B. and Spakman, W.: Microblock rotations and fault coupling in SE Asia triple junction (Sulawesi, Indonesia) from GPS and earthquake slip vector data, *Journal of Geophysical Research*, 111(B8), doi:10.1029/2005jb003963, 2006.
- Socquet, A., Hollingsworth, J., Pathier, E. and Bouchon, M.: Evidence of supershear during the 2018 magnitude 7.5 Palu earthquake from space geodesy, *Nature Geoscience*, 12(3), 192–199, doi:10.1038/s41561-018-0296-0, 2019.
- 575 Steed, R. J., Fuenzalida, A., Bossu, R., Bondár, I., Heinloo, A., Dupont, A., Saul, J. and Strollo, A.: Crowdsourcing triggers rapid, reliable earthquake locations, *Sci Adv*, 5(4), eaau9824, doi:10.1126/sciadv.aau9824, 2019.
- Stewart, I. S., Ickert, J. and Lacassin, R.: Communicating Seismic Risk: the Geoethical Challenges of a People-Centred, Participatory Approach, *Annals of Geophysics*, 60, doi:10.4401/ag-7593, 2018.
- 580 Takahashi, B., Tandoc, E. C., Jr. and Carmichael, C.: Communicating on Twitter during a disaster: An analysis of tweets during Typhoon Haiyan in the Philippines, *Comput. Human Behav.*, 50, 392–398, doi:10.1016/j.chb.2015.04.020, 2015.
- Ulrich, T., Vater, S., Madden, E. H., Behrens, J., van Dinther, Y., van Zelst, I., Fielding, E. J., Liang, C. and Gabriel, A.-A.: Coupled, Physics-Based Modeling Reveals Earthquake Displacements are Critical to the 2018 Palu, Sulawesi Tsunami, *Pure Appl. Geophys.*, 81, 5679, doi:10.1007/s00024-019-02290-5, 2019.
- 585 Valkaniotis, S., Ganas, A., Tsironi, V. and Barberopoulou, A.: A preliminary report on the M7.5 Palu 2018 earthquake co-seismic ruptures and landslides using image correlation techniques on optical satellite data, , doi:10.5281/zenodo.1467128, 2018.
- Van Noorden, R.: Online collaboration: Scientists and the social network, *Nature*, 512(7513), 126–129, doi:10.1038/512126a, 2014.
- 590 Watkinson, I. M. and Hall, R.: Fault systems of the eastern Indonesian triple junction: evaluation of Quaternary activity and implications for seismic hazards, *Geological Society, London, Special Publications*, 441(1), 71–120, doi:10.1144/sp441.8, 2017.
- Watkinson, I. M. and Hall, R.: Impact of communal irrigation on the 2018 Palu earthquake-triggered landslides, *Nat. Geosci.*, 463, 878, doi:10.1038/s41561-019-0448-x, 2019.
- 595 Wei-Haas, M.: Strange waves rippled around the world, and nobody knows why, *National Geographic*, 28th November [online] Available from: <https://www.nationalgeographic.com/science/2018/11/strange-earthquake-waves-rippled-around-world-earth-geology/> (Accessed 5 July 2019a), 2018a.
- Wei-Haas, M.: The Science of Indonesia’s Surprise Tsunami, *National Geographic*, 1st October [online] Available from: <https://www.nationalgeographic.com/environment/2018/09/indonesia-tsunami-sulawesi-explained-science-geology/> (Accessed 5 July 2019b), 2018b.
- 600 Williams, R. and Krippner, J.: The use of social media in volcano science communication: challenges and opportunities, *Volcanica*, 1(2), i–viii, doi:10.30909/vol.01.02.i-viii, 2019.
- Wright, S.: Warning system might have saved lives in Indonesian tsunami, *Associated Press*, 1st October [online] Available from: <https://apnews.com/110eb42c03324a08bf5b3e6b58c309e> (Accessed 5 September 2019), 2018.
- 605 Zakaria, N., Amelinckx, A. and Wilemon, D.: Working Together Apart? Building a Knowledge-Sharing Culture for Global Virtual Teams, *Creativity and Innovation Management*, 13(1), 15–29, doi:10.1111/j.1467-8691.2004.00290.x, 2004.

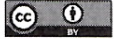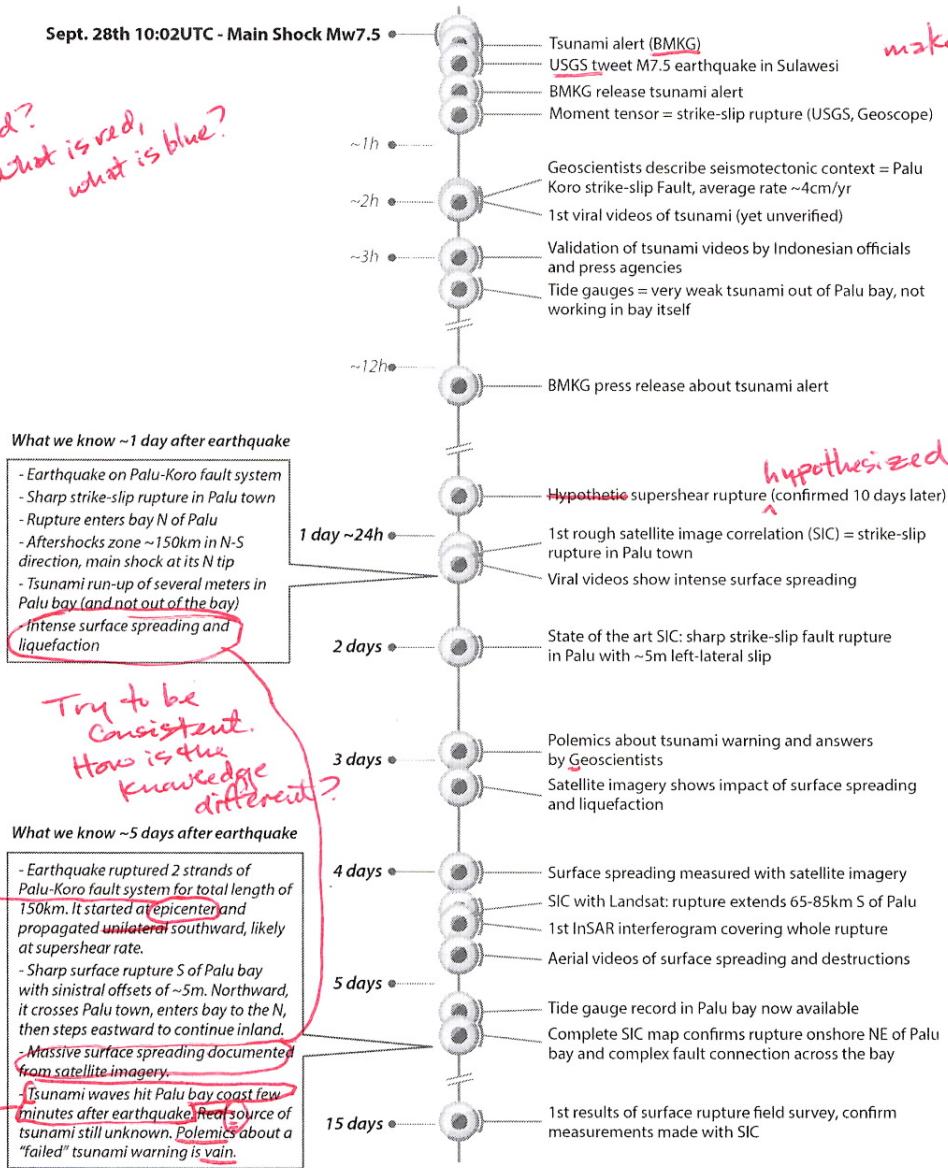

**Figure 1:** Timeline of geophysical events, acquisition and dissemination of observations, and knowledge building via Twitter in the hours and days following the Palu earthquake and tsunami of September 28, 2018. See Table S1 for links to relevant tweets.

610

*Legend? what is red, what is blue?*

*make format of items consistent*

*hypothetical*

*Try to be consistent. How is the knowledge different?*

*hypocenter?*

*wasn't this known within one day?*

*regarding geophysical events*

*This is actually a timeline of info posted on twitter, right? The only geophysical event (rather than appearance of info about it on twitter) is the main shock noted at the timeline's start, right?*

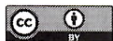

**Robin Lacassin** @RLacassin · 1 oct. 2018  
"Most people were shocked by the earthquake and did not pay any thought that a tsunami will come"  
[apnews.com/110eb42c03324a...](https://apnews.com/110eb42c03324a...)  
Polemics about failed warning is vain. If people not understand the MEANING of the earthquake, they will not behave appropriately. Education-training 1st. 1/



Warning system might have saved lives in Indonesian tsunami  
MAKASSAR, Indonesia (AP) — An early warning system that might have prevented some deaths in the tsunami that hit an Indonesian island on ...  
[apnews.com](https://apnews.com)

5 59 62

**Robin Lacassin** @RLacassin  
2/ Story about delayed early warning system in @AP paper is pointless (project was aimed 1st to subduction off Sumatra / Java). In near field, like #earthquake in Palu bay, when you feel a big earthquake go up & away from sea shore. Warning is crucial at larger distances though.

Traduire le Tweet  
9:14 AM · 1 oct. 2018 · Twitter Web Client

**Anthony Lomax** @ALomaxNet · 1 oct. 2018  
En réponse à @stevenjgibbons et @BaptisteGomb  
"With the tsunami generated so close to Palu, there was little time for people to escape."

2 4

**Anthony Lomax** @ALomaxNet · 1 oct. 2018  
Given the size of the bay north of Palu and distance to the epicenter, a very robust and high quality sensor perhaps every 10km would be needed for a warning system that could have helped - about 5000 to 10000 such sensors to cover Indonesia...  
[en.wikipedia.org/wiki/List\\_of\\_c...](https://en.wikipedia.org/wiki/List_of_c...)

1 2 7

**Jason "Jay" R. Patton** @patton\_cascadia · 1 oct. 2018  
indeed, the eq is the warning.

7

*do you have any examples of responses from non-geoscientists, to indicate that these messages of clarification reached the public? Or evidence you could include in the caption?*

Figure 2: Example of tweets about the “failed tsunami warning” polemics.

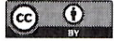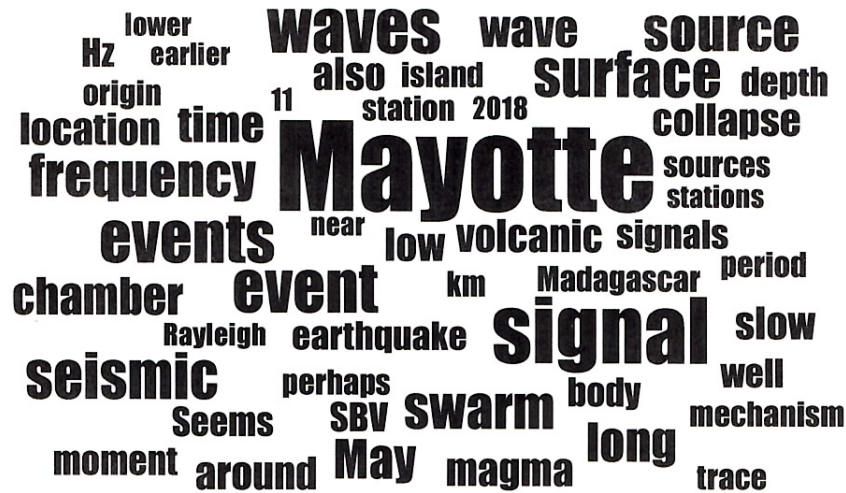

Word cloud of most frequent words  
Part 1: first 60 relevant tweets (Nov. 11, 2018, VLP seismic event)  
(made with wordcloud:https://www.jasondavies.com/wordcloud/)

a

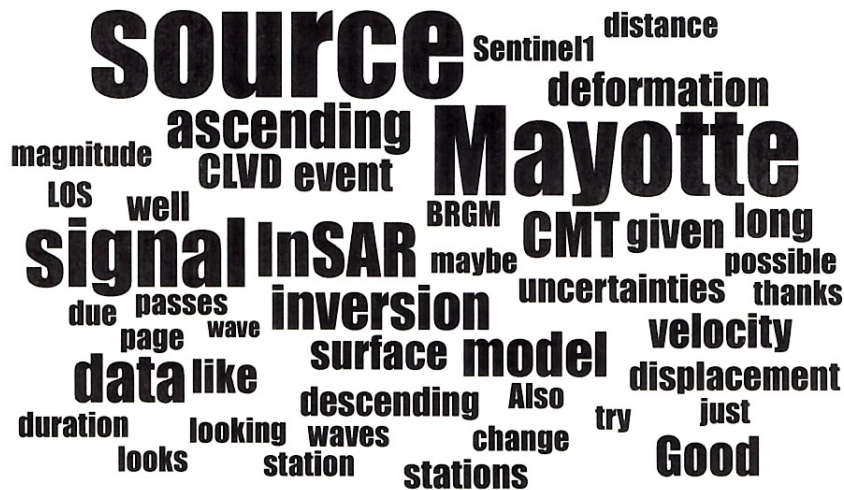

Word cloud of most frequent words  
Part 2: following 60 relevant tweets (Nov. 11, 2018, VLP seismic event)  
(made with wordcloud:https://www.jasondavies.com/wordcloud/)

b

**Figure 3:** Word clouds outlining the evolution of topics discussed on Twitter after the Mayotte Nov 11, 2018 long period seismic event. Top word cloud illustrates first 60 tweets of the selected Twitter moment (see text); bottom one corresponds to the following 60 tweets.

*Handwritten notes:*  
both word cloud (b)  
refer to specific section

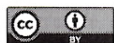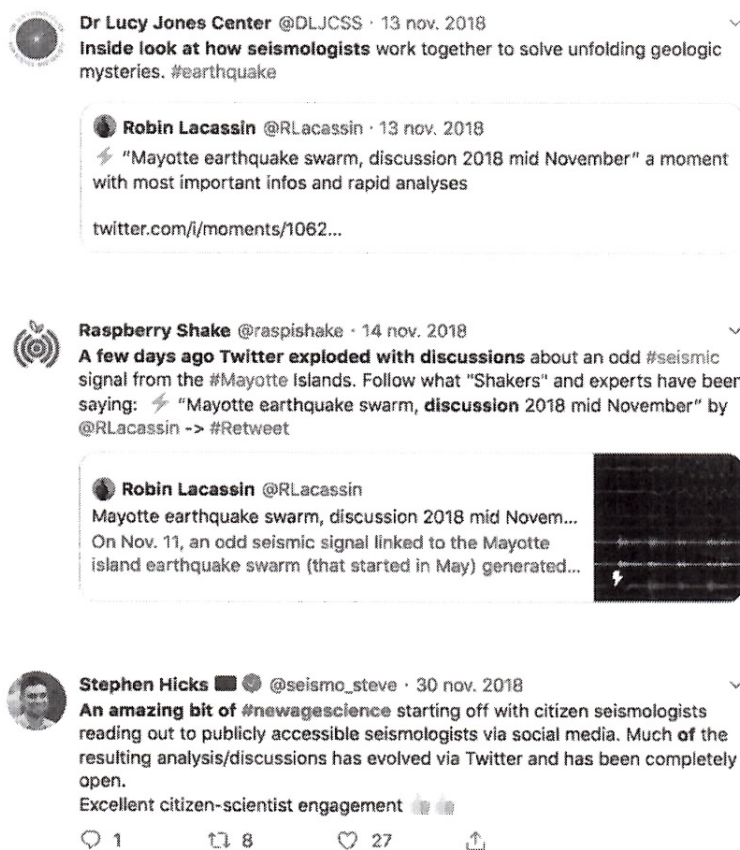

615 **Figure 4:** Example of tweets <sup>s</sup> outlining the active online scientific discussion about the Mayotte Nov<sup>o</sup> 11, 2018 event.

*It would be more helpful to include tweets exemplifying how the discussion was unfolding - could be a separate figure*



# Rapid collaborative knowledge building via Twitter after significant geohazard events

## Supplementary information

5 Robin Lacassin<sup>1</sup>, Maud Devès<sup>1-2</sup>, Stephen P. Hicks<sup>3</sup>, Jean-Paul Ampuero<sup>4</sup>, Remy Bossu<sup>5-6</sup>, Lucile Bruhat<sup>7</sup>, Daryono<sup>8</sup>, Desianto F. Wibisono<sup>9</sup>, Laure Fallou<sup>5</sup>, Eric J. Fielding<sup>10</sup>, Alice-Agnes Gabriel<sup>11</sup>, Jamie Gurney<sup>12</sup>, Janine Krippner<sup>13</sup>, Anthony Lomax<sup>14</sup>, Muh. Ma'rufin Sudibyo<sup>15</sup>, Astyka Pamumpuni<sup>16</sup>, Jason R. Patton<sup>17</sup>, Helen Robinson<sup>18</sup>, Mark Tingay<sup>19</sup>, Sotiris Valkaniotis<sup>20</sup>

Corresponding author: lacassin@ipggp.fr

1 Université de Paris, Institut de physique du globe de Paris, CNRS, F-75005 Paris, France

10 2 Université de Paris, Institut Humanités Sciences Sociétés, Centre de Recherche Psychanalyse Médecine et Société, CNRS, Paris, France

3 Department of Earth Science and Engineering, Imperial College London, United Kingdom

4 Université Côte d'Azur, IRD, CNRS, Observatoire de la Côte d'Azur, Géoazur, France

5 European-Mediterranean Seismological Centre, France

15 6 CEA Centre DAM Ile de France F-91297 Arpajon, France

7 Laboratoire de Géologie, Ecole normale supérieure, PSL Research University, CNRS, Paris, France

8 Earthquake and Mitigation Division, Agency for Meteorology Climatology and Geophysics, Indonesia.

9 Semarang, Central Java, Indonesia

10 Jet Propulsion Laboratory, California Institute of Technology, Pasadena, California, USA

20 11 Department of Earth and Environmental Sciences, Ludwig-Maximilians-Universität München, Munich, Germany

12 Citizen scientist, United Kingdom Earthquake Bulletin, United Kingdom

13 Global Volcanism Program, National Museum of Natural History, Smithsonian Institution, Washington D.C., USA

25 14 ALomax Scientific, Mouans-Sartoux, France

15 Kebumen Natural Disaster Response, Kebumen, Central Java, Indonesia

16 Institut Teknologi Bandung, Indonesia

17 Department of Geology, Humboldt State University, California, USA

18 Powerful Earth, United Kingdom

30 19 University of Adelaide, Australia

20 Koronidos 9, 42131 Trikala, Greece

Table S1: time table of main events, informations and preliminary geophysical results about the Palu earthquake and tsunami of September 2018. For each subject, we provide links, and posting time (UTC) of a choice of relevant tweets (non exhaustive list).

*specific date*

| Important event, information or result                                                                                                             | tweeted by                                                     | Time UTC | Day UTC                                                                                                                                                                                                                                                                                                                                                                                                                                                                                                                                                                                                                |
|----------------------------------------------------------------------------------------------------------------------------------------------------|----------------------------------------------------------------|----------|------------------------------------------------------------------------------------------------------------------------------------------------------------------------------------------------------------------------------------------------------------------------------------------------------------------------------------------------------------------------------------------------------------------------------------------------------------------------------------------------------------------------------------------------------------------------------------------------------------------------|
| Foreshock M6.1 (USGS loc and time)                                                                                                                 |                                                                | 07 00    | 2018-09-28                                                                                                                                                                                                                                                                                                                                                                                                                                                                                                                                                                                                             |
| Main shock M7.5 (USGS loc and time)                                                                                                                |                                                                | 10.02    | 2018-09-28                                                                                                                                                                                                                                                                                                                                                                                                                                                                                                                                                                                                             |
| BMKG first tsunami alert                                                                                                                           | @infoBMKG                                                      | 10 07    | 2018-09-28 <a href="https://twitter.com/infoBMKG/status/1045616058499923968">https://twitter.com/infoBMKG/status/1045616058499923968</a>                                                                                                                                                                                                                                                                                                                                                                                                                                                                               |
| BMKG tweet main shock                                                                                                                              | @infoBMKG                                                      | 10 09    | 2018-09-28 <a href="https://twitter.com/infoBMKG/status/1045616401891831808">https://twitter.com/infoBMKG/status/1045616401891831808</a>                                                                                                                                                                                                                                                                                                                                                                                                                                                                               |
| Preliminary first motion mechanism: Strike-slip                                                                                                    | @ALomaxNet                                                     | 10 16    | 2018-09-28 <a href="https://twitter.com/ALomaxNet/status/1045618253652004864">https://twitter.com/ALomaxNet/status/1045618253652004864</a>                                                                                                                                                                                                                                                                                                                                                                                                                                                                             |
| USGS tweet main shock                                                                                                                              | @USGSBigQuakes                                                 | 10 20    | 2018-09-28 <a href="https://twitter.com/USGSBigQuakes/status/1045619235718742016">https://twitter.com/USGSBigQuakes/status/1045619235718742016</a>                                                                                                                                                                                                                                                                                                                                                                                                                                                                     |
| BMKG release tsunami alert                                                                                                                         | @infoBMKG                                                      | 10 36    | 2018-09-28 <a href="https://twitter.com/infoBMKG/status/1045623296509628416">https://twitter.com/infoBMKG/status/1045623296509628416</a><br><a href="https://twitter.com/infoBMKG/status/1045626891808301056">https://twitter.com/infoBMKG/status/1045626891808301056</a>                                                                                                                                                                                                                                                                                                                                              |
| Strike-slip Moment tensor                                                                                                                          | e.g. @geoscope_IPGP                                            | 10 47    | 2018-09-28 e.g. <a href="https://twitter.com/geoscope_ipgp/status/1045626078314860544">https://twitter.com/geoscope_ipgp/status/1045626078314860544</a>                                                                                                                                                                                                                                                                                                                                                                                                                                                                |
| Seismotectonic context: strike-slip rupture on Palu-Koro Fault, a major fault system with ~4cm/yr long term rate (comparable to San Andreas Fault) | several                                                        | 12 00    | 2018-09-28 Several tweets between 11.45 and 12:30<br>e.g. <a href="https://twitter.com/RLacassin/status/1045648266958901248">https://twitter.com/RLacassin/status/1045648266958901248</a><br><br><a href="https://twitter.com/CPGeophysics/status/1045651583206400001">https://twitter.com/CPGeophysics/status/1045651583206400001</a><br><a href="https://twitter.com/RLacassin/status/1045650928404221952">https://twitter.com/RLacassin/status/1045650928404221952</a><br><a href="https://twitter.com/janinekruppner/status/1045921889640247286">https://twitter.com/janinekruppner/status/1045921889640247286</a> |
| First viral videos of tsunami in Palu (unverified and validated at this time)                                                                      | several                                                        | 12 00    | 2018-09-28 Several tweets around 11.45-12.00<br>e.g. <a href="https://twitter.com/pmichannel/status/10456442813202475008">https://twitter.com/pmichannel/status/10456442813202475008</a><br><a href="https://twitter.com/AJKEQ_Bulletin/status/10456442813202475008">https://twitter.com/AJKEQ_Bulletin/status/10456442813202475008</a><br><a href="https://twitter.com/Ochi_Oc09/status/1045643781742026752">https://twitter.com/Ochi_Oc09/status/1045643781742026752</a>                                                                                                                                             |
| Confirmation of tsunami, and official validation of viral videos                                                                                   | e.g. @AP quoting Indonesian agency, @janinekruppner @Sutopo_PN | 13 00    | 2018-09-28 From ~ 13:00<br>e.g. <a href="https://twitter.com/AP/status/1045661340029849600">https://twitter.com/AP/status/1045661340029849600</a><br><br><a href="https://twitter.com/janinekruppner/status/1045700064243527880">https://twitter.com/janinekruppner/status/1045700064243527880</a><br><a href="https://twitter.com/Sutopo_PN/status/1045718740208238592">https://twitter.com/Sutopo_PN/status/1045718740208238592</a><br><a href="https://twitter.com/Sutopo_PN/status/1045724373884186625">https://twitter.com/Sutopo_PN/status/1045724373884186625</a>                                               |
| Seismotectonic map showing past seismicity                                                                                                         | @CPPGeophysics                                                 | 15 20    | 2018-09-28 e.g. <a href="https://twitter.com/CPGeophysics/status/1045694737049563144">https://twitter.com/CPGeophysics/status/1045694737049563144</a>                                                                                                                                                                                                                                                                                                                                                                                                                                                                  |
| Tide gauges: very weak signal out of Palu bay - and not working at Pantoloan in the bay itself                                                     | e.g. @RLacassin                                                | 15 37    | 2018-09-28 <a href="https://twitter.com/RLacassin/status/1045699078301110274">https://twitter.com/RLacassin/status/1045699078301110274</a><br><br><a href="https://twitter.com/RLacassin/status/1045699548488807552">https://twitter.com/RLacassin/status/1045699548488807552</a>                                                                                                                                                                                                                                                                                                                                      |
| BMKG press release about tsunami alert and why they ended it                                                                                       | @infoBMKG                                                      | 00 40    | 2018-09-29 <a href="https://twitter.com/infoBMKG/status/1045835591319871489">https://twitter.com/infoBMKG/status/1045835591319871489</a>                                                                                                                                                                                                                                                                                                                                                                                                                                                                               |
| Synthetic poster about seismotectonic context and seismicity                                                                                       | @paltcn_cascadia                                               | 01 07    | 2018-09-29 <a href="https://twitter.com/paltcn_cascadia/status/1045842544729382313">https://twitter.com/paltcn_cascadia/status/1045842544729382313</a>                                                                                                                                                                                                                                                                                                                                                                                                                                                                 |
| Hypothetic supershear rupture (will be confirmed later)                                                                                            | @ALomaxNet, @DocTerremoto                                      |          | <a href="https://twitter.com/ALomaxNet/status/1045921875691198723">https://twitter.com/ALomaxNet/status/1045921875691198723</a><br><br>Will be confirmed later. e.g. <a href="https://twitter.com/DocTerremoto/status/1049155918849220610">https://twitter.com/DocTerremoto/status/1049155918849220610</a> and <a href="https://twitter.com/DocTerremoto/status/1052275076412952576">https://twitter.com/DocTerremoto/status/1052275076412952576</a>                                                                                                                                                                   |
| Planet lab imagery suggests rupture right in Palu town                                                                                             | @SotisValkan                                                   | 13 40    | 2018-09-29 <a href="https://twitter.com/SotisValkan/status/1046031899460857856">https://twitter.com/SotisValkan/status/1046031899460857856</a>                                                                                                                                                                                                                                                                                                                                                                                                                                                                         |
| 1st rough Planet lab satellite image correlation (SIC) reveals fault rupture in Palu (results will become viral)                                   | @SotisValkan                                                   | 14 04    | 2018-09-29 <a href="https://twitter.com/SotisValkan/status/1046037887811121152">https://twitter.com/SotisValkan/status/1046037887811121152</a>                                                                                                                                                                                                                                                                                                                                                                                                                                                                         |
| Videos of dramatic surface spreading / liquefaction (will become viral) - and discussion                                                           | e.g. @janinekruppner, @paltcn_cascadia                         | 15 33    | 2018-09-29 e.g. <a href="https://twitter.com/janinekruppner/status/1046060393871945732">https://twitter.com/janinekruppner/status/1046060393871945732</a> (and following thread) -<br><br><a href="https://twitter.com/paltcn_cascadia/status/1046086947246544801">https://twitter.com/paltcn_cascadia/status/1046086947246544801</a><br><a href="https://twitter.com/davepetley/status/1046651448128417792">https://twitter.com/davepetley/status/1046651448128417792</a>                                                                                                                                             |
| About 1 day after earthquake, we already know:                                                                                                     |                                                                |          | Earthquake on Palu-Koro fault system with sharply localised strike-slip rupture in Palu town itself - Rupture enters the bay N of Palu (but it's uncertain how it prolongates offshore and northward) - Aftershock zone extend for ~150km in N-S direction, main shock near its N tip - Tsunami with run-up of several meters in Palu bay (and not out of the bay), dramatic surface spreading and liquefaction in and SE of Palu town                                                                                                                                                                                 |
| State of the art SIC: localized strike-slip rupture in Palu with ~5m of coseismic slip (will become viral)                                         | @SotisValkan                                                   | 09 52    | 2018-09-30 <a href="https://twitter.com/SotisValkan/status/1046337001572749313">https://twitter.com/SotisValkan/status/1046337001572749313</a>                                                                                                                                                                                                                                                                                                                                                                                                                                                                         |
| Updated SIC map of rupture in Palu and displacement profile                                                                                        | @SotisValkan                                                   | 16 10    | 2018-09-30 <a href="https://twitter.com/SotisValkan/status/1046491895131222017">https://twitter.com/SotisValkan/status/1046491895131222017</a><br><br><a href="https://twitter.com/SotisValkan/status/10465396026435850240">https://twitter.com/SotisValkan/status/10465396026435850240</a>                                                                                                                                                                                                                                                                                                                            |
| Polemics in international media and social networks about tsunami warning                                                                          | Several                                                        | 06 00    | 2018-10-01 e.g. <a href="https://twitter.com/stevenjibbons/status/1046846734993190912">https://twitter.com/stevenjibbons/status/1046846734993190912</a><br><br><a href="https://twitter.com/SquigglyVolcano/status/1046812928488411136">https://twitter.com/SquigglyVolcano/status/1046812928488411136</a><br><a href="https://twitter.com/RLacassin/status/104676569658303168">https://twitter.com/RLacassin/status/104676569658303168</a>                                                                                                                                                                            |
| Geoscientists answer on tsunami warning polemics                                                                                                   | Several                                                        | 09 00    | 2018-10-01 e.g. <a href="https://twitter.com/ALomaxNet/status/1046655205180403712">https://twitter.com/ALomaxNet/status/1046655205180403712</a><br><br><a href="https://twitter.com/RLacassin/status/1046657674480466528">https://twitter.com/RLacassin/status/1046657674480466528</a><br><a href="https://twitter.com/RLacassin/status/1046659678044925992">https://twitter.com/RLacassin/status/1046659678044925992</a><br><a href="https://twitter.com/structuregeo/status/104666312636609406">https://twitter.com/structuregeo/status/104666312636609406</a>                                                       |
| Satellite Imagery: surface spreading / liquefaction (confirmed by video footage), and tsunami impact                                               | e.g. @davepetley @StefLhermitte                                | 12 24    | 2018-10-01 e.g. <a href="https://twitter.com/davepetley/status/1046767725295873344">https://twitter.com/davepetley/status/1046767725295873344</a><br><br><a href="https://twitter.com/StefLhermitte/status/1046738656063614978">https://twitter.com/StefLhermitte/status/1046738656063614978</a><br><a href="https://twitter.com/StefLhermitte/status/1046909782915977218">https://twitter.com/StefLhermitte/status/1046909782915977218</a>                                                                                                                                                                            |
| Map of coseismic displacement now for 20km south of Palu (from Planet lab SIC)                                                                     | @SotisValkan                                                   | 17 44    | 2018-10-01 <a href="https://twitter.com/SotisValkan/status/1046818189349482018">https://twitter.com/SotisValkan/status/1046818189349482018</a><br><br><a href="https://twitter.com/SotisValkan/status/1046671425053093888">https://twitter.com/SotisValkan/status/1046671425053093888</a>                                                                                                                                                                                                                                                                                                                              |
| Surface spreading measured with SIC                                                                                                                | @SotisValkan                                                   | 10 09    | 2018-10-02 <a href="https://twitter.com/SotisValkan/status/1047065964314005508">https://twitter.com/SotisValkan/status/1047065964314005508</a><br>then, on Oct. 10 <a href="https://twitter.com/SotisValkan/status/1049979122129260544">https://twitter.com/SotisValkan/status/1049979122129260544</a>                                                                                                                                                                                                                                                                                                                 |
| Wider SIC map from Sentinel2 imagery: rupture extends >50km south of Palu                                                                          | @SotisValkan                                                   | 16 45    | 2018-10-02 <a href="https://twitter.com/SotisValkan/status/1047165698542383104">https://twitter.com/SotisValkan/status/1047165698542383104</a>                                                                                                                                                                                                                                                                                                                                                                                                                                                                         |

*unvalidated?*

*Hypothesized*

*Planet Labs?*



| Important event, information or result                                                                                                                | tweeted by                                                                                                                                                                                                                                                                                                                                                                                                                                                                                                                                                                                                                                                                  | Time UTC | Day UTC    |                                                                                                                                                                                                                                                                                                                                                                                                                                                                                                                                                                  |
|-------------------------------------------------------------------------------------------------------------------------------------------------------|-----------------------------------------------------------------------------------------------------------------------------------------------------------------------------------------------------------------------------------------------------------------------------------------------------------------------------------------------------------------------------------------------------------------------------------------------------------------------------------------------------------------------------------------------------------------------------------------------------------------------------------------------------------------------------|----------|------------|------------------------------------------------------------------------------------------------------------------------------------------------------------------------------------------------------------------------------------------------------------------------------------------------------------------------------------------------------------------------------------------------------------------------------------------------------------------------------------------------------------------------------------------------------------------|
| SIC with Landsat images: confirms sharp rupture extending 65-85km S of Palu                                                                           | @TTremblingEarth                                                                                                                                                                                                                                                                                                                                                                                                                                                                                                                                                                                                                                                            | 18:11    | 2018-10-02 | <a href="https://twitter.com/TTremblingEarth/status/1047187334326902785">https://twitter.com/TTremblingEarth/status/1047187334326902785</a>                                                                                                                                                                                                                                                                                                                                                                                                                      |
| First <b>INSAR</b> Interferogram (from ALOS2 satellite) covering whole rupture                                                                        | @planet_mech                                                                                                                                                                                                                                                                                                                                                                                                                                                                                                                                                                                                                                                                | 19:21    | 2018-10-02 | <a href="https://twitter.com/planet_mech/status/1047204981709754368">https://twitter.com/planet_mech/status/1047204981709754368</a><br><br><a href="https://twitter.com/planet_mech/status/1047282079229079552">https://twitter.com/planet_mech/status/1047282079229079552</a><br><a href="https://twitter.com/EricFielding/status/1047287623352553472">https://twitter.com/EricFielding/status/1047287623352553472</a><br><a href="https://twitter.com/EricFielding/status/1047238304410755072">https://twitter.com/EricFielding/status/1047238304410755072</a> |
| Aerial video footage of massive surface spreading and destruction SE of Palu                                                                          | @Sutopo_PN                                                                                                                                                                                                                                                                                                                                                                                                                                                                                                                                                                                                                                                                  | 21:16    | 2018-10-02 | <a href="https://twitter.com/Sutopo_PN/status/1047233769541853184">https://twitter.com/Sutopo_PN/status/1047233769541853184</a>                                                                                                                                                                                                                                                                                                                                                                                                                                  |
| Tide gauge record in Pantaloan now available. Tsunami 1st arrival only few minutes after earthquake, ~2m height                                       | @marufins<br>@ALomaxNet<br>@RLacassin                                                                                                                                                                                                                                                                                                                                                                                                                                                                                                                                                                                                                                       | 12:45    | 2018-10-03 | <a href="https://twitter.com/marufins/status/1047467798996242433">https://twitter.com/marufins/status/1047467798996242433</a><br><br><a href="https://twitter.com/ALomaxNet/status/1047478168175763456">https://twitter.com/ALomaxNet/status/1047478168175763456</a><br><a href="https://twitter.com/RLacassin/status/1047481324733386752">https://twitter.com/RLacassin/status/1047481324733386752</a><br><a href="https://twitter.com/ALomaxNet/status/1047479081556742144">https://twitter.com/ALomaxNet/status/1047479081556742144</a>                       |
| Complete SIC map (Sentinel2 Imagery): rupture stepping onshore E of Palu bay; imply complex connection across the bay, Epicenter at N tip of rupture. | @SotisValkan                                                                                                                                                                                                                                                                                                                                                                                                                                                                                                                                                                                                                                                                | 15:57    | 2018-10-03 | <a href="https://twitter.com/SotisValkan/status/1047515941570007042">https://twitter.com/SotisValkan/status/1047515941570007042</a><br><br>then, 15 days later a preliminary report is posted <a href="https://twitter.com/SotisValkan/status/1053238164679204854">https://twitter.com/SotisValkan/status/1053238164679204854</a><br>Report <a href="https://zenodo.org/record/1467128">https://zenodo.org/record/1467128</a>                                                                                                                                    |
| Validated <b>INSAR</b> Interferogram, and along-track displacement map, covering whole rupture (from ALOS2 satellite)                                 | @GSI_chirin                                                                                                                                                                                                                                                                                                                                                                                                                                                                                                                                                                                                                                                                 | 09:53    | 2018-10-05 | <a href="https://twitter.com/GSI_chirin/status/1046149205481472000">https://twitter.com/GSI_chirin/status/1046149205481472000</a><br><br><a href="http://www.gsi.go.jp/cais/topic181005-index-e.html">http://www.gsi.go.jp/cais/topic181005-index-e.html</a>                                                                                                                                                                                                                                                                                                     |
| <b>Known and unknown 8 days after earthquake:</b>                                                                                                     | Earthquake ruptured two strands of Palu-Koro fault system for a total length of ~150km. One strand S of Palu bay with extremely sharp localized surface rupture and sinistral offsets of ~5m. It crosses Palu town and enters the bay to the N. But the rupture does not continue straight northward, but steps eastward to continue inland. Earthquake rupture started to the N at epicenter and propagated <del>unilaterally</del> southward, likely at supershear rate. Massive surface spreading is documented from satellite imagery. Tsunami waves hit Palu Bay coast few minutes after earthquake. <u>Polemics</u> about a 'failed' tsunami warning is <u>vain</u> . |          |            |                                                                                                                                                                                                                                                                                                                                                                                                                                                                                                                                                                  |
| First results of surface rupture field survey by Indonesian geologists                                                                                | @pamumpuni                                                                                                                                                                                                                                                                                                                                                                                                                                                                                                                                                                                                                                                                  | 20:42    | 2018-10-13 | e.g. <a href="https://twitter.com/pamumpuni/status/1051211619781361664">https://twitter.com/pamumpuni/status/1051211619781361664</a><br><br><a href="https://twitter.com/pamumpuni/status/1050351296111243264">https://twitter.com/pamumpuni/status/1050351296111243264</a>                                                                                                                                                                                                                                                                                      |

**INSAR**

hypo-center?

**Link to tweets from 2018 Sept 28 to Oct 5**

|                            |                                                                                                                                                                                                                                                                             |
|----------------------------|-----------------------------------------------------------------------------------------------------------------------------------------------------------------------------------------------------------------------------------------------------------------------------|
| <b>Ampuero P.</b>          | <a href="https://twitter.com/search?q=(from%3Aadocierremoto)%20until%3A2018-10-05%20since%3A2018-09-28&amp;src=typed_query&amp;f=live">https://twitter.com/search?q=(from%3Aadocierremoto)%20until%3A2018-10-05%20since%3A2018-09-28&amp;src=typed_query&amp;f=live</a>     |
| <b>Daryono D.</b>          | <a href="https://twitter.com/search?q=(from%3ADaryonoBMKG)%20until%3A2018-10-08%20since%3A2018-09-28&amp;src=typed_query&amp;f=live">https://twitter.com/search?q=(from%3ADaryonoBMKG)%20until%3A2018-10-08%20since%3A2018-09-28&amp;src=typed_query&amp;f=live</a>         |
| <b>Desianto F.W.</b>       | <a href="https://twitter.com/search?q=(from%3ATDesiantoFW)%20until%3A2018-10-05%20since%3A2018-09-28&amp;src=typed_query&amp;f=live">https://twitter.com/search?q=(from%3ATDesiantoFW)%20until%3A2018-10-05%20since%3A2018-09-28&amp;src=typed_query&amp;f=live</a>         |
| <b>Elliott A.</b>          | <a href="https://twitter.com/search?q=(from%3ATTremblingEarth)%20until%3A2018-10-05%20since%3A2018-09-28&amp;src=typed_query&amp;f=live">https://twitter.com/search?q=(from%3ATTremblingEarth)%20until%3A2018-10-05%20since%3A2018-09-28&amp;src=typed_query&amp;f=live</a> |
| <b>Fielding E.</b>         | <a href="https://twitter.com/search?q=(from%3AEricFielding)%20until%3A2018-10-05%20since%3A2018-09-28&amp;src=typed_query&amp;f=live">https://twitter.com/search?q=(from%3AEricFielding)%20until%3A2018-10-05%20since%3A2018-09-28&amp;src=typed_query&amp;f=live</a>       |
| <b>Gabriel A.A.</b>        | <a href="https://twitter.com/search?q=(from%3AInseismoland)%20until%3A2018-10-05%20since%3A2018-09-28&amp;src=typed_query&amp;f=live">https://twitter.com/search?q=(from%3AInseismoland)%20until%3A2018-10-05%20since%3A2018-09-28&amp;src=typed_query&amp;f=live</a>       |
| <b>Gombert B.</b>          | <a href="https://twitter.com/search?q=(from%3ABaptisteGomb)%20until%3A2018-10-05%20since%3A2018-09-28&amp;src=typed_query&amp;f=live">https://twitter.com/search?q=(from%3ABaptisteGomb)%20until%3A2018-10-05%20since%3A2018-09-28&amp;src=typed_query&amp;f=live</a>       |
| <b>Gurney J.</b>           | <a href="https://twitter.com/search?q=(from%3AUKEO_Bulletin)%20until%3A2018-10-05%20since%3A2018-09-28&amp;src=typed_query&amp;f=live">https://twitter.com/search?q=(from%3AUKEO_Bulletin)%20until%3A2018-10-05%20since%3A2018-09-28&amp;src=typed_query&amp;f=live</a>     |
| <b>Hudnut K.</b>           | <a href="https://twitter.com/search?q=(from%3Akwhudnut)%20until%3A2018-10-05%20since%3A2018-09-28&amp;src=typed_query&amp;f=live">https://twitter.com/search?q=(from%3Akwhudnut)%20until%3A2018-10-05%20since%3A2018-09-28&amp;src=typed_query&amp;f=live</a>               |
| <b>Krippner J.</b>         | <a href="https://twitter.com/search?q=(from%3AJanineKrippner)%20until%3A2018-10-05%20since%3A2018-09-28&amp;src=typed_query&amp;f=live">https://twitter.com/search?q=(from%3AJanineKrippner)%20until%3A2018-10-05%20since%3A2018-09-28&amp;src=typed_query&amp;f=live</a>   |
| <b>Lacassin R.</b>         | <a href="https://twitter.com/search?q=(from%3ARLacassin)%20until%3A2018-10-05%20since%3A2018-09-28&amp;src=typed_query&amp;f=live">https://twitter.com/search?q=(from%3ARLacassin)%20until%3A2018-10-05%20since%3A2018-09-28&amp;src=typed_query&amp;f=live</a>             |
| <b>Muh Marufin Sudibyo</b> | <a href="https://twitter.com/search?q=(from%3AMarufin)%20until%3A2018-10-05%20since%3A2018-09-28&amp;src=typed_query&amp;f=live">https://twitter.com/search?q=(from%3AMarufin)%20until%3A2018-10-05%20since%3A2018-09-28&amp;src=typed_query&amp;f=live</a>                 |
| <b>Lomax A.</b>            | <a href="https://twitter.com/search?q=(from%3ALomaxnet)%20until%3A2018-10-05%20since%3A2018-09-28&amp;src=typed_query&amp;f=live">https://twitter.com/search?q=(from%3ALomaxnet)%20until%3A2018-10-05%20since%3A2018-09-28&amp;src=typed_query&amp;f=live</a>               |
| <b>Pamumpuni A.</b>        | <a href="https://twitter.com/search?q=(from%3APamumpuni)%20until%3A2018-10-05%20since%3A2018-09-28&amp;src=typed_query&amp;f=live">https://twitter.com/search?q=(from%3APamumpuni)%20until%3A2018-10-05%20since%3A2018-09-28&amp;src=typed_query&amp;f=live</a>             |
| <b>Patton J.</b>           | <a href="https://twitter.com/search?q=(from%3Apatton_cascadia)%20until%3A2018-10-05%20since%3A2018-09-28&amp;src=typed_query&amp;f=live">https://twitter.com/search?q=(from%3Apatton_cascadia)%20until%3A2018-10-05%20since%3A2018-09-28&amp;src=typed_query&amp;f=live</a> |
| <b>Peñey D.</b>            | <a href="https://twitter.com/search?q=(from%3AAdvapelley)%20until%3A2018-10-05%20since%3A2018-09-28&amp;src=typed_query&amp;f=live">https://twitter.com/search?q=(from%3AAdvapelley)%20until%3A2018-10-05%20since%3A2018-09-28&amp;src=typed_query&amp;f=live</a>           |
| <b>Valkaniotis S.</b>      | <a href="https://twitter.com/search?q=(from%3ASolisValkan)%20until%3A2018-10-05%20since%3A2018-09-28&amp;src=typed_query&amp;f=live">https://twitter.com/search?q=(from%3ASolisValkan)%20until%3A2018-10-05%20since%3A2018-09-28&amp;src=typed_query&amp;f=live</a>         |

*link doesn't work*

Table 2: Non exhaustive list of academic or citizen scientists involved in geophysical discussions on twitter about the Palu earthquake and tsunami. For each person, the respective link uses twitter search syntax to give access to her/his tweeter feed in the days after the earthquake (from 2018 Sept28 to Oct05). These threads include exchanges between scholars, but also explanations toward the public and media people (including local people in Indonesia).
